# Supplementary material for: UK parents’ attitudes towards meningococcal group B (MenB) vaccination: a qualitative analysis
Source: PubMed Central journal article supplement — BMJ Open. 2017 May 4;7(4):e012851. doi: 10.1136/bmjopen-2016-012851 (PMC5623433; doi:10.1136/bmjopen-2016-012851), 2017-05-04
Supplement: bmjopen-2016-012851.draft_revisions.pdf [file bmjopen-2016-012851.draft_revisions.pdf]

# BMJ Open

## UK parents' attitudes to MenB vaccination: A qualitative analysis

|                                 |                                                                                                                                                                                           |
|---------------------------------|-------------------------------------------------------------------------------------------------------------------------------------------------------------------------------------------|
| Journal:                        | <i>BMJ Open</i>                                                                                                                                                                           |
| Manuscript ID                   | bmjopen-2016-012851                                                                                                                                                                       |
| Article Type:                   | Research                                                                                                                                                                                  |
| Date Submitted by the Author:   | 29-May-2016                                                                                                                                                                               |
| Complete List of Authors:       | Jackson, Cath; University of York, York Trials Unit<br>Yarwood, Joanne; Public Health England<br>Saliba, Vanessa; Public Health England<br>Bedford, Helen; UCL, Institute of Child Health |
| <b>Primary Subject Heading</b>: | Immunology (including allergy)                                                                                                                                                            |
| Secondary Subject Heading:      | Public health, Health services research, Qualitative research                                                                                                                             |
| Keywords:                       | MenB, meningococcal, vaccination, immunisation, immunization                                                                                                                              |
|                                 |                                                                                                                                                                                           |

SCHOLARONE™  
Manuscripts

1 **UK parents' attitudes to MenB vaccination: A qualitative analysis**  
2  
3  
4

5 Cath Jackson<sup>1</sup>, Joanne Yarwood<sup>2</sup>, Vanessa Saliba<sup>2</sup>, Helen Bedford<sup>3</sup>  
6  
7

8  
9  
10 <sup>1</sup>Department of Health Sciences, University of York, York, UK

11  
12 <sup>2</sup>Public Health England, London, UK

13  
14 <sup>3</sup>Institute of Child Health, UCL, London, UK  
15  
16

17  
18 Corresponding author:  
19

20 Helen Bedford, Senior Lecturer, Institute of Child Health, UCL, 30 Guildford Street London, WC1N  
21

22 1EH [h.bedford@ucl.ac.uk](mailto:h.bedford@ucl.ac.uk) Tel. 020 7905 2333  
23  
24

25  
26 Key words: MenB, meningococcal, vaccination, immunisation, immunization  
27

28 Word count: 4152  
29  
30  
31  
32  
33  
34  
35  
36  
37  
38  
39  
40  
41  
42  
43  
44  
45  
46  
47  
48  
49  
50  
51  
52  
53  
54  
55  
56  
57  
58  
59  
60

**ABSTRACT**

**Objectives:** This cross-sectional, qualitative interview study aimed to (1) explore existing knowledge of, and attitudes, to group B meningococcal disease and MenB vaccine among parents of young children; and (2) seek views on the communications developed by Public Health England for the introduction of serogroup B meningococcal (MenB) vaccine (Bexsero®) into the UK childhood immunisation schedule.

**Setting:** Community centres, mother and toddler groups and a midwife-led Facebook group.

**Participants:** 60 parents of children under two years of age.

**Results:** Although recognising the severity of meningitis and septicaemia, parents' knowledge of group B meningococcal disease and MenB vaccine was poor. Whilst nervous about fever, most said they would take their child for MenB vaccination despite its link to fever. Most parents had liquid paracetamol at home, many were willing to administer it after MenB vaccination as a preventive measure as advised. A minority had concerns about that. There were mixed views on the acceptability of four vaccinations at the 12-month booster visit; some preferred one visit but just over half favoured to split the vaccines over two visits. Parents were clear on the information they required before attending the immunisation appointment.

**Conclusions:** The successful implementation of the MenB vaccination programme depends on its acceptance by parents. In view of parents' recognition of the severity of meningitis and septicaemia, the MenB vaccination programme is likely to be successful. However, the need for additional injections, the likelihood of post immunisation fever and its management are issues about which parents will need information and reassurance from health professionals. Public Health England has developed written information for parents, informed by these findings.

**ARTICLE SUMMARY****Strengths and limitations of this study**

- This is the only current UK study providing detailed, up-to-date information for Public Health England and primary care health professionals to facilitate the successful implementation of MenB vaccine.
- A mix of parents across parental age, ethnicity and number of children were recruited, these parental characteristics are associated with uptake of childhood vaccination.
- Parents with a university degree or fully-immunised children were over represented in the study.

## UK parents' attitudes to MenB vaccination: A qualitative analysis

### INTRODUCTION

Following the successful introduction of meningococcal C (MenC) vaccine in 1999[1] serogroup B is the leading cause of meningococcal disease in the UK accounting for 85-90% of all cases and with the highest incidence in infants.[2] In September 2015, the UK introduced routine meningococcal B vaccination (MenB) into the childhood immunisation schedule at two, four and 12 months of age.[3]

The successful implementation of vaccines depends on many factors including parental acceptability. Since meningitis is recognised by parents to be a serious, potentially life threatening infection[4] and the perceived severity of an infection is an important determinant of vaccine acceptance,[5] the prospects for a successful MenB programme are good. However, the introduction of MenB vaccine raises specific issues which may impact on its acceptability for some parents and which need addressing to ensure successful implementation. First, although MenB is well evaluated in trials and in campaigns[6, 7] the UK is the first country to introduce Bexsero (a specific MenB vaccine) as a publically funded programme to help prevent group B meningococcal disease. More injections are needed: a total of three at the two and four month vaccination visits and four at the 12 month visit. We know that endorsement by health professionals plays an important role in parent acceptance of multiple injections; [8, 9] however an increasing number of vaccines and multiple injections offered routinely concerns some parents who feel, albeit misguidedly, that too many vaccines may overwhelm their child's immune system.[4] Parents also worry about increased pain and possible adverse events following multiple injections.[9] In the USA, where more vaccines and vaccine doses are recommended, some parents are reported to delay or even decline vaccines.[10] In view of some existing parental concern about the number of vaccines already recommended, there is the potential for this to be mirrored in the UK.

In addition, when MenB vaccine is administered to infants concomitantly with other vaccines it gives rise to higher levels (51%-61%) of fever ( $\geq 38^{\circ}\text{C}$ ) compared to routine vaccines given alone (23%).[7] To reduce this risk, the Joint Committee on Vaccination and Immunisation recommended

1 that when MenB vaccine is given with the other vaccines at two and four months of age, parents  
2 should be advised to administer paracetamol prophylactically.[3] This represents a change in  
3  
4  
5  
6  
7  
8  
9  
10  
11  
12  
13  
14  
15  
16  
17  
18  
19  
20  
21  
22  
23  
24  
25  
26  
27  
28  
29  
30  
31  
32  
33  
34  
35  
36  
37  
38  
39  
40  
41  
42  
43  
44  
45  
46  
47  
48  
49  
50  
51  
52  
53  
54  
55  
56  
57  
58  
59  
60

We aimed to explore parents' knowledge of, and attitudes to, MenB disease and MenB vaccine.  
We also sought views on the content of communications developed by Public Health England  
(PHE).

## **METHODS**

### **Participants and Recruitment**

A large body of literature[14-19], identifies two broad categories of parental factors influencing uptake of childhood vaccination. The first relates to socioeconomic disadvantage where, despite being motivated to have their children vaccinated, parents lack access to resources and support to overcome logistical barriers such as no private transport (access). The second relates to parents' concerns about the safety or beliefs about the necessity of vaccines (acceptance). To ensure that we spoke with parents in both categories, we set out to recruit 60 parents of children under the age of two years across different parental age, socio-economic status (using education as a proxy), ethnicity and number of children. Parents were recruited in London and Yorkshire. In two London districts, selected for their socio-demographic mix, parents were recruited through five Children's Centres (CC). HB attended mother and baby sessions in the CCs and distributed study information to parents, returning a week later to conduct interviews with consenting parents. In Yorkshire, parents were recruited from two mother and toddler groups by distributing study information and via an advert posted to a midwife-led Facebook group. Interested mothers contacted CJ for more information and interviews were conducted subsequently.

### **Data Collection**

1 Individual and group interviews were conducted by CJ and HB in February and March 2015 prior to  
2 the announcement of the introduction of MenB vaccine. Both have considerable experience as  
3 immunisation researchers; and HB was previously a health visitor. They presented themselves to  
4 participants as independent to the MenB vaccination programme and advised that any specific  
5 questions about immunisation would be answered after the interviews. Parents who individually  
6 contacted the research team to participate were interviewed on their own in their home or  
7 workplace. Parents recruited through the CCs and mother and toddler groups took part in group  
8 interviews conducted away from the main mother and baby session. The topic guide (see  
9 Supplementary File 1) was piloted with four parents of children under the age of two years. No  
10 changes were made. Interviews explored awareness of MenB disease and vaccine, perceptions of  
11 fever generally and attitudes to use of paracetamol as a prophylactic. Attitudes to an increased  
12 number of injections were discussed and preferences for the number at each vaccination visit  
13 explored. Finally, parents described the information they considered to be most important for  
14 inclusion in MenB leaflets. Individual interviews lasted between 28 and 57 minutes. Group  
15 interviews lasted between 30 and 65 minutes. All interviews were digitally audio-recorded.

### 34 **Data Analysis**

36 The audio-recordings were transcribed verbatim and personal data anonymised. The individual  
37 and group interview data were analysed together using the six steps of thematic analysis. This is a  
38 method of 'identifying, analysing and reporting patterns (themes) within the data'. [20 p4] It is a  
39 useful approach for producing qualitative analyses suited to informing programme development.  
40

44 The six steps were as follows:

- 46 • Familiarisation: Both researchers (CJ and HB) became immersed in the raw data by 'repeated  
47 reading' of the transcripts and listed key ideas for coding.
- 48 • Generating initial codes: Initial codes and a coding framework were developed by CJ, informed  
49 predominantly by the study objectives (a deductive approach), although novel views expressed  
50 by participants were also captured (an inductive approach). The interview data were then  
51 coded by CJ to this framework using Nvivo Version 10 software.

- Searching for themes: The codes were then organised by CJ into potential themes and subthemes. At this point similarities and differences in views across education, ethnicity and number of children were explored.
- Reviewing themes: The coded data within each potential theme were reviewed by CJ and HB and the themes modified to ensure that they formed a coherent pattern. Each theme was then reviewed to see if it 'worked' in relation to the entire data set.
- Defining and naming themes: A short paragraph was produced by CJ for each theme and subthemes to define the 'essence' of the theme/subthemes and names were allocated.
- Producing the report: The thematic analysis was written up by CJ.

### Ethics approval

University College London Research Ethics Committee approved the study and parents gave written informed consent to take part.

## FINDINGS

### Participants

Information was gathered from 60 parents (Table 1) through seven individual and 12 group interviews (range 2-7 parents). Whilst the sample size was pre-specified data saturation occurred in that no new relevant knowledge emerged in the final few interviews. Two thirds (62%) lived in London and one third (38%) were from Yorkshire. Participants were predominantly female (92%) and two thirds (65%) were first time parents. Their age range was 20-43 years. Half were White British (55%). Half (55%) were educated to Bachelor degree or higher. Two parents were medically trained. Participants' children (n=62) ranged from 12 days to 24 months of age. Almost all participants (92%) self-reported that their child/children were fully immunised.

**Table 1:** Parent characteristics

|      |        | N  | %  |
|------|--------|----|----|
| Site | London | 37 | 62 |



|                                             |                           |                  |                   |
|---------------------------------------------|---------------------------|------------------|-------------------|
|                                             | Yorkshire                 | 23               | 38                |
| Gender                                      | Male                      | 5                | 8                 |
|                                             | Female                    | 55               | 92                |
| Ethnicity                                   | White British             | 33               | 55                |
|                                             | White Other               | 10               | 16                |
|                                             | Black British Caribbean   | 4                | 7                 |
|                                             | Black African             | 5                | 8                 |
|                                             | Asian Chinese             | 1                | 2                 |
|                                             | Asian Other               | 4                | 7                 |
|                                             | Missing                   | 3                | 5                 |
| Highest Educational Qualification           | GCSE or equivalent        | 6                | 10                |
|                                             | A level or equivalent     | 15               | 25                |
|                                             | Bachelor degree or higher | 33               | 55                |
|                                             | Missing                   | 6                | 10                |
| No. Children                                | One                       | 39               | 65                |
|                                             | More than one             | 20               | 33                |
|                                             | Missing                   | 1                | 2                 |
| Self-reported                               | Full                      | 55               | 92                |
| Immunisation Status of Children             | Partial                   | 3                | 5                 |
|                                             | None                      | 1                | 2                 |
|                                             | Missing                   | 1                | 2                 |
|                                             |                           | <b>Mean (SD)</b> | <b>Range</b>      |
| Mean Age of Parent (years)                  |                           | 31.6 (5.10)      | 20-43             |
| Mean Age of Children under 2 years (months) |                           | 8.7 (5.60)       | 12 days-24 months |

### Parents' Views

We report findings based on thematic analysis of the data. Where views differ according to parents' characteristics these are indicated. Illustrative quotes are presented throughout. Views collected on the draft leaflets are not presented here as these were fed back directly to PHE.

## Views on MenB Disease and Vaccination

### *Knowledge about MenB and Perception of Risk of the Disease*

Although most parents were unfamiliar with the term 'meningococcal disease', they had heard of meningitis, recognising it to be life threatening and needing urgent medical attention. They identified high temperature, fever and a rash (recognised using the glass test) as symptoms to look out for (Quote 1, Table 2). Parents were generally unsure of details of how meningococcal infection spreads, its incidence and who is most likely to catch it (Quote 2, Table 2). A minority of parents mentioned different strains (commonly C) but they were less aware of how strains differ, although it was suggested the difference was viral-bacterial or due to severity. Parents were generally less knowledgeable about septicaemia but knew it to be serious. Four parents who were well informed about both forms of meningococcal disease were either medically trained or had paid privately for their children to have the MenB vaccination.

### *Knowledge of and Attitudes to MenB Vaccine*

Although some parents knew there were vaccines in the schedule to protect against meningococcal disease, most commonly mentioning MenC, most had not heard of MenB vaccine. Because of this parents did not initially identify any safety concerns associated with MenB vaccine, although a small minority talked about feeling nervous when a new vaccine is introduced and their concerns that it has been sufficiently tested (Quote 3, Table 2). The four parents who were well informed about MenB disease were also knowledgeable about MenB vaccine although a GP had not yet heard about it in her professional role (Quote 4, Table 2).

**Table 2:** Illustrative Quotes – Knowledge of, and attitudes to, MenB disease and vaccination

|   |                                                                                                                                                                                                                                                           |
|---|-----------------------------------------------------------------------------------------------------------------------------------------------------------------------------------------------------------------------------------------------------------|
| 1 | <p>Q. So what do you know about meningitis?<br/> <i>I know that it can cause fatality, it's very important to be identified quickly, and get the child medical help as, as soon as possible; and you usually associate it with the rash, like you</i></p> |
|---|-----------------------------------------------------------------------------------------------------------------------------------------------------------------------------------------------------------------------------------------------------------|

|   |                                                                                                                                                                                                                                                                                                                                                                                                                                       |
|---|---------------------------------------------------------------------------------------------------------------------------------------------------------------------------------------------------------------------------------------------------------------------------------------------------------------------------------------------------------------------------------------------------------------------------------------|
|   | <i>know the clear glass you put on the, on the rash, it doesn't go away.</i><br>Y004a                                                                                                                                                                                                                                                                                                                                                 |
| 2 | <i>How it can come on, it can progress, that, I mean I wouldn't know that, so, and I wouldn't know the symptoms of it either.... or if they did have it, you know, I wouldn't know what would be worrying or what; I mean, you know, kids get fevers and they get, you know, ear infections, chest infections, things like that, but I wouldn't know what would mean it's this, how would you know it's definitely this?</i><br>Y008a |
| 3 | <i>It's gonna need more information, I think, because it's a new vaccine, everyone's gonna be wary of it, it's not an old vaccine that's been around for years already, and I think for a new vaccine they're gonna need to put more information than that on it, personally, because obviously everyone's gonna be wary of it.</i><br>L007g                                                                                          |
| 4 | <i>Q: So you hadn't heard of it in your role as a GP?</i><br><i>No. No, I hadn't heard of it, and, and it does tend to be at the point of implementation that we, we tend to hear...cos there's so much, so much going on I suppose all the time.</i><br>Y009a                                                                                                                                                                        |

## Views on the Increased Risk of Fever following Vaccination

### *Managing Fever*

Most parents expressed worry about fever; particularly its cause and how it might progress for example febrile convulsions (Quote 1, Table 3). They described a variety of strategies to manage fever: removing clothing, applying a damp cloth/putting the child in the bath, checking the child's temperature and administering liquid paracetamol (identified as Calpol®). Whilst many parents discussed using Calpol®, a small number acknowledged that it cannot be used extensively with very young babies (Quote 2, Table 3). Some recognised that their confidence in managing fever had developed as their child got older as they 'could gauge' the child better (Quote 3, Table 3).

### *Concerns about Fever*

Most parents described becoming concerned about fever based on their child's temperature and if it persists (Quote 4, Table 3). At this point they would seek advice from their GP or Health Visitor, telephone 111, or if very concerned go to Accident and Emergency. First time mothers were more likely to report seeking help immediately, often from a knowledgeable family member.

### *Fever caused by Vaccination*

Some parents said that they would be less worried knowing a fever is caused by vaccination in that, to some extent, it is expected (Quote 5, Table 3) with a few commenting that fever is preferable to meningitis (Quote 6, Table 3).

Other parents expressed concern that a vaccine would elicit fever. Several of these, most of whom were first time parents, talked about this being particularly worrying when their child is two months old, as it is their first appointment for vaccinations, they don't know their baby well yet and cannot administer much Calpol® to a child so young (Quote 7, Table 3).

#### *Would the Fever deter parents from accepting MenB Vaccine?*

The overwhelming majority of parents said that despite the link with fever, it would not prevent them having MenB vaccine. A few explained that this is because they trust that it has been tested and is safe (Quote 8, Table 3). A minority talked about making specific preparations such as, considering the timing of the appointment (Quote 9, Table 3) or looking into this vaccination very carefully to be reassured it is worth having.

**Table 3:** Illustrative Quotes – Views on Fever

|   |                                                                                                                                                                                                                                                                                                                                                                                                                                                                                                                                                                                                                                                                           |
|---|---------------------------------------------------------------------------------------------------------------------------------------------------------------------------------------------------------------------------------------------------------------------------------------------------------------------------------------------------------------------------------------------------------------------------------------------------------------------------------------------------------------------------------------------------------------------------------------------------------------------------------------------------------------------------|
| 1 | <i>Yeah, it's, it's scary. Two weeks ago she had a fever, she had it at about, almost 40 her fever was, and it, it is really scary, cos she would literally get really hot to where her face goes red, she's all sweating, then she'll cool down and get really, really hot again, and it's really hard to manage cos you don't know what to do, cos you don't know whether you should be putting cold, cold towel on them like, but you don't wanna shock their body into like all this cold, coldness at once, cos that's where they start, they start fitting. She had a, a small little fit, like a small convulsion, cos she got too hot.</i><br>L007g               |
| 2 | <i>See that's, the only, the only problem that you have with that is that when they're eight weeks old, no, four weeks old, anything under the, under the age of three months you have to be careful how much Calpol and stuff you can give them, and the only thing you can give them is Calpol. So they are really careful, they, they do tell you to be really careful, but. So if they get a really bad fever, you can only give them one dose of Calpol in a 24 hour period, and that's the 2.5. I mean that should work, but if it didn't you're a bit stuck as a parent as to what you can do to help baby settle down.</i><br>Y006a                               |
| 3 | <i>I feel that now she's nine months I'm, I'm more confident when she gets sick or has, has had a fever now, I understand her more and I have natural instincts of how to look after her and how bad she is I can gauge, where when she was younger and she did get a fever from some, the, I think it was the two months, the sixteen week one, I'm not sure, that I was so scared when she was, fell ill and, you know, the, the only kind of conversation you get is, if they should get a temperature give them Calpol, but you're just so stressed as it is when they're so young that to have it so, to have it so young is just, to gauge the fever that young</i> |

|   |                                                                                                                                                                                                                                                                                                                                                                                                                                                                                                                                                                                                                                                                                                                                                                                                                                                                                                                                                                                                                                                                                                                                                                                                                                                                                                                        |
|---|------------------------------------------------------------------------------------------------------------------------------------------------------------------------------------------------------------------------------------------------------------------------------------------------------------------------------------------------------------------------------------------------------------------------------------------------------------------------------------------------------------------------------------------------------------------------------------------------------------------------------------------------------------------------------------------------------------------------------------------------------------------------------------------------------------------------------------------------------------------------------------------------------------------------------------------------------------------------------------------------------------------------------------------------------------------------------------------------------------------------------------------------------------------------------------------------------------------------------------------------------------------------------------------------------------------------|
|   | <i>is more scary than when they are older, yeah.</i><br>L008d                                                                                                                                                                                                                                                                                                                                                                                                                                                                                                                                                                                                                                                                                                                                                                                                                                                                                                                                                                                                                                                                                                                                                                                                                                                          |
| 4 | <i>It (NHS Choices) tells you if a temperature lasts more than three, seventy two hours that you should be worried. I know from my personal experience when (name of daughter) had a temperature and I have, and it's not been breaking for more than about forty-eight hours, that's when I've started to worry.</i><br>L005a                                                                                                                                                                                                                                                                                                                                                                                                                                                                                                                                                                                                                                                                                                                                                                                                                                                                                                                                                                                         |
| 5 | <i>And, and what I find reassuring with the imm, immunisation induced fevers you sort of know what it is, whereas if it's just a random, you know, incident, you'd never, I don't know, I'd be more worried if I, if it was non-immunisation related.</i><br>L001a                                                                                                                                                                                                                                                                                                                                                                                                                                                                                                                                                                                                                                                                                                                                                                                                                                                                                                                                                                                                                                                     |
| 6 | <i>It's better than meningitis.</i><br>Y007a<br><br><i>I'd rather him have a fever...</i><br>Y007b<br><br><i>That's what I mean, you can, you can control fever with Calpol and certain things. If they get baby ill from not having the vaccine, it's a lot harder to control than a fever.</i><br>Y007a                                                                                                                                                                                                                                                                                                                                                                                                                                                                                                                                                                                                                                                                                                                                                                                                                                                                                                                                                                                                              |
| 7 | <i>I, I wouldn't be happy with it. Cos at two months you've not given her paracetamol before and you don't know what the side effects are. If she had a fever I would give it to her. But no, I wouldn't like the idea of, personally, at so young.</i><br>L004a                                                                                                                                                                                                                                                                                                                                                                                                                                                                                                                                                                                                                                                                                                                                                                                                                                                                                                                                                                                                                                                       |
| 8 | <i>Q. Would you have it for your baby if the MenB vaccine was introduced?</i><br><br><i>I'd be so worried about a brand new vaccine, like our generation being kind of tested on it almost, but I think if it was the fact that everyone did and it's, I probably would, I'd be worried about it though, but I would, if it was, yeah.</i><br>L003c<br><br><i>Q. Because it's a new thing?</i><br><br><i>Yeah, it's a new thing and they've been tested, you know, but I think, I think I would.</i><br>L003c<br><br><i>Yeah, again I probably would, I mean it, I would probably, the increased risk of fever would be worrying, but I think if there's anything that they can be protected against, I tend to just go along with what the government are recommending, and if they, if they say it's safe and I tend to just believe that that's, that's true (laughs) trust that it's true, and, and go with it, and I think I'd rather have them immunised against something and have a little bit of a fever for a day than not, and just them, them catching something awful. (laughs)</i><br>L003g<br><br><i>I'd still have to be so convinced that it was worth it for, to have fever and for them to be having extra stuff in their bodies....I'd need to be really convinced it was worthwhile.</i><br>Y003a |
| 9 | <i>Q. Does that (the fever) change how you feel about taking him?</i><br><br><i>It doesn't, for me not necessarily, no, cos I suppose at least if you know it's gonna happen you can be equipped with the tools to deal with it, and you can be practical in terms of when you go and have that done and being ready for it and working around it.</i><br>Y005a                                                                                                                                                                                                                                                                                                                                                                                                                                                                                                                                                                                                                                                                                                                                                                                                                                                                                                                                                        |

Acceptability of Administering Paracetamol Post-vaccination

### *Routine Administration of Paracetamol*

Most parents said that they have Calpol® at home and routinely use it, although not when a child is only two months old (Quote 1, Table 4). A small minority of parents described having difficulties giving their child Calpol® as he/she spits it out. Two parents appeared to not know that Calpol is liquid infant paracetamol. A few parents (one GP) pointed out that the regular instructions for administering Calpol® to a two month old baby are different to the advice for use of paracetamol post MenB vaccination; and that this inconsistency might worry and confuse parents (Quote 2, Table 4). Two parents did not agree with giving their child paracetamol because of concerns about its side effects and the view that it is used far more routinely in the UK compared to their home country (Quote 3, Table 4).

### *Administration of Paracetamol as a Preventive Measure*

Views on parents' willingness to administer prophylactic paracetamol after MenB vaccination differed. Many parents would be willing to administer paracetamol on the assumption that this is best for their child, even if they were worried about doing so (Quote 4, Table 4). However, questions were raised about whether they should wake a sleeping baby to administer a dose, or whether the third dose could be given the following morning, and what should they do if they forgot to give the paracetamol or if the paracetamol does not work (Quote 5, Table 4).

However a few parents expressed worries about administering prophylactic paracetamol. Reasons for this were a preference not to give paracetamol to their child generally, that their child struggles to take paracetamol (they spit it out), a worry about putting something else into the child's body after vaccination and that paracetamol might mask vaccine side effects. Several of these parents explicitly stated that they would not give their child the paracetamol after MenB vaccination unless the child develops a fever (Quote 6, Table 4).

**Table 4:** Illustrative quotes - Acceptability of Administering Paracetamol Post-vaccination

|   |                                                                                                    |
|---|----------------------------------------------------------------------------------------------------|
| 1 | <i>Q. Has everybody got paracetamol at home?</i>                                                   |
|   | <i>About two months I didn't, but now he's getting a bit older I have got some in, in, just in</i> |



|                                                    |                                                                                                                                                                                                                                                                                                                                                                                                                                                                                                                              |
|----------------------------------------------------|------------------------------------------------------------------------------------------------------------------------------------------------------------------------------------------------------------------------------------------------------------------------------------------------------------------------------------------------------------------------------------------------------------------------------------------------------------------------------------------------------------------------------|
| 1<br>2<br>3<br>4                                   | <i>case, cos of teething and vaccinations and everything else. But at, at, at two months probably not.</i><br>L007e                                                                                                                                                                                                                                                                                                                                                                                                          |
| 5<br>6<br>7<br>8<br>9                              | <i>2 People will worry about, cos it says, the, the advice on the bottle is from three months and then there's just like a one-off post-immunisation dose in younger ones. So you'd have to be quite clear that it was safe; I think parents will worry about the safety of giving more than, more paracetamol than is prescribed on the bottle you're buying.</i><br>Y009a                                                                                                                                                  |
| 10<br>11<br>12<br>13<br>14<br>15<br>16<br>17<br>18 | <i>3 I have allergic just when you're saying paracetamol. I'm not agreeing with paracetamol. I know a whole country they been treating with paracetamol but I don't accept this.</i><br><br><i>Q: But in terms of fever and how to deal with it?</i><br><br><i>It, but you under, just look, they treat you with everything, all sickness they give you paracetamol, it's can't be, can't be helpful this stuff. But if you understand me, I don't, I'm not gonna use paracetamol.</i><br>L002a                              |
| 19<br>20<br>21<br>22<br>23<br>24                   | <i>4 I suppose if I knew it was gonna stop him being unwell I'd do it. So I suppose if they're saying there's a higher risk that he's gonna be unwell straight after it, give him Calpol to try and make him comfortable I wouldn't have a concern with that. But yeah, I mean I don't think as a mum you'd want your child to be in any pain so if someone tells you take this and it's not gonna hurt you'd do it wouldn't you?</i><br>Y005a                                                                               |
| 25<br>26<br>27<br>28<br>29<br>30                   | <i>5 What if the paracetamol actually doesn't lower the fever then at what point do I say, you know, cos if I go to the doctors and say, oh, you know, he's had the vaccinations but he's got a fever, and they tend to say, oh yeah, it's absolutely fine, it's due to the vaccinations, but then at what point do I say, OK, well he has had the vaccinations but the fever's carried on going up, paracetamol's not working, given him Ibuprofen, what now?</i><br>L008c                                                  |
| 31<br>32<br>33<br>34<br>35<br>36<br>37<br>38       | <i>6 I think if it was me as well I would have issues about the appropriateness of just giving (name of daughter) paracetamol for the sake of giving her paracetamol when she's not got a temperature. So I could understand, I think I would feel happier giving her a dose of paracetamol for, for a temperature rather than a dose of paracetamol just for the sake of having paracetamol. I don't think I would probably give (name of daughter) the paracetamol, if she was asleep I wouldn't wake her up.</i><br>L005a |

#### Acceptability of four injections at the 12-Month Booster Visit

Most parents were accepting of the vaccination schedule, trusting that it is informed by sound research and therefore safe (Quote 1, Table 5). A small number mentioned that the schedule is complex and busy which can be particularly hard to 'keep a handle on' with a new baby. Views on the acceptability of four injections at the 12-month appointment differed.

Some parents (often with more than one child) preferred all four injections in one visit. This view was based on practical reasons such as the inconvenience of booking and finding time to attend multiple appointments, particularly for those mothers who have returned to work by 12 months (Quote 2, Table 5). They acknowledged that there would be an increased likelihood of them

1 missing appointments if they are on different days. These parents also talked about preferring to  
 2  
 3 'get it all over with in one go' in terms of reducing distress to the child at the appointment and  
 4  
 5 afterwards (Quote 3, Table 5). A few of these parents spoke about their child being more 'robust'  
 6  
 7 by 12 months and so they felt more comfortable in taking them for multiple injections at that age.  
 8  
 9

10  
 11 Just over half of parents expressed a preference to separate the vaccines over different visits with  
 12  
 13 most preferring two injections at two visits a month apart, although two parents wanted even more  
 14  
 15 visits with fewer injections at each. These preferences were predominantly to avoid fever (if that is  
 16  
 17 associated with the MenB vaccine at this age) and distress to the baby on the day (Quote 4, Table  
 18  
 19 5). A small number of parents talked about preferring to avoid overloading their child's immune  
 20  
 21 system with multiple vaccines. These issues were more important for these parents than the  
 22  
 23 potential inconvenience of multiple appointments.  
 24  
 25

26  
 27  
 28 A few parents suggested that they should be given a choice about the 12-month booster visit as  
 29  
 30 they know what works best for their child. Similar numbers of parents disagreed, preferring to be  
 31  
 32 offered the safest approach as well as acknowledging the difficulty of implementing a choice  
 33  
 34 system.  
 35  
 36  
 37

38 **Table 5:** Illustrative quotes – Acceptability of four vaccines at 12-month booster visit  
 39

|                            |                                                                                                                                                                                                                                                                                                                                                                                                         |
|----------------------------|---------------------------------------------------------------------------------------------------------------------------------------------------------------------------------------------------------------------------------------------------------------------------------------------------------------------------------------------------------------------------------------------------------|
| 40<br>41<br>42             | 1<br><i>I just put my trust in the fact that it's the best thing for her and I'm sure the healthcare professionals know what they are doing and so I don't think about it too much.</i><br>L004b                                                                                                                                                                                                        |
| 43<br>44<br>45<br>46<br>47 | 2<br><i>I just, with having two really young children, the logistics of getting a doctor's appointment, getting there, and if, it sounds odd but if they're gonna be ill anyway, and as long as the fever's not more dangerous, I'm not too, I, I don't feel strongly.</i><br>L001a                                                                                                                     |
| 48<br>49<br>50<br>51<br>52 | 3<br><i>I know it's not nice when they're having it done, but it only lasts for a few minutes, and I think for the sake of having the whole build up of going back again for another set and will they get another fever again and will it happen again, I think sometimes it's just... Best to get it all out of the way, let them have their five minutes' cry and forget it. (laughter)</i><br>L003c |
| 53<br>54<br>55<br>56<br>57 | 4<br><i>I'll prefer to split because her immune system, you know, can be built and have a chance; if you give too much, you never know what could happen. OK, it's in one sense that's like, you know, we have to come back a few times, but on the other hand it's my baby, you know, health, so...</i><br>L003a                                                                                       |



## Information Needs

### *Information about MenB Disease*

Parents wanted to understand why MenB disease is something they need to vaccinate their child against. To achieve this, they wanted to know how to recognise it, what are the signs and symptoms (identified as the most important information; Quote 1, Table 6), how many people catch it, who is most at risk, how it spreads and how it is different to other strains of meningococcal disease

### *Information about MenB Vaccine*

Parents identified the most important information to be about the vaccine's short and long term side effects, likely occurrence and how to respond to them (Quote 1, Table 6). They also wanted information to compare the benefits versus the risks of the vaccine, present how it has been tested and if it has been used elsewhere. Other details of the vaccine required include the reason it is needed in addition to MenC vaccine, that it does not protect against all meningococcal disease and how it is administered (number and timing of doses, injection/oral/nasal spray). They also wanted to understand why it causes fever, the likelihood of fever if administered alongside other vaccines and what would prevent their child having the injection on the day.

### *Information about Fever and Paracetamol*

Parents identified the most important information about fever and paracetamol to be about how to administer paracetamol following MenB vaccination (dose, frequency, what happens if it does not work (Quote 2, Table 6) as well as alternatives to giving paracetamol, whether they should wake a sleeping baby to administer the paracetamol as well as what level and length of fever is normal, when should they be concerned and where should they go to seek help.

### *Timing of Information*

Most parents preferred to have information about MenB vaccine and the associated fever before they attend the appointment (Quote 3, Table 6). Suggested methods of doing this were: sending the leaflet out with the invitation letter, giving it to the parent when they book the appointment at the

GP practice or the practice nurse/health visitor providing it in routine appointments a few weeks before. A few parents said that whilst they would prefer to receive the Men B vaccine leaflet in advance, they would want the paracetamol leaflet at the appointment as that is the time they will focus on the specifics of timing and dosage (Quote 4, Table 6). Two parents talked about preferring to have information about all vaccinations before the baby is born as they had time and 'headspace' then to read it (Quote 5, Table 6).

**Table 6:** Illustrative quotes – Information needs

|   |                                                                                                                                                                                                                                                                                                                                                                                                                                                                                                                 |
|---|-----------------------------------------------------------------------------------------------------------------------------------------------------------------------------------------------------------------------------------------------------------------------------------------------------------------------------------------------------------------------------------------------------------------------------------------------------------------------------------------------------------------|
| 1 | <i>Well I like, obviously that, you know, this would make me, the statistics would make me think oh right, I need to get that done, the fear of the disease, you know, knowing what it is and what it can do would make, help me make the decision as well. And then, but then this one has all about the signs and symptoms and things like that, which, I mean you would want to know especially after the injection, more information about how to deal with the effects of the illness itself.</i><br>Y008a |
| 2 | <i>Q. What's the most important issue for you to know about the paracetamol and fever? What's the key thing the leaflet needs to include?</i><br><br><i>How much.</i><br>Y007e<br><br><i>How often.</i><br>Y007b<br><br><i>...like a big space in sort of like, cos it only says here, I mean a lot of people might skim over that or misread it, for the dose</i><br>Y007d<br><br><i>Q. So the dose is the key thing you want guidance on?</i><br><br><i>Yeah.</i><br>Y007d                                    |
| 3 | <i>Q. When would you want to get this leaflet, when would it be most useful?</i><br><br><i>I guess maybe with the letter that you get to take, you know. Yeah, cos I wouldn't want it to arrive for the vaccination and be like, right, here's a leaflet do you want it now? I'd be like oh my gosh, I don't know, but maybe with a letter when you're due for your vaccination saying, you know, this is the new one, would you be happy to have it? At least then I can book then...</i><br>Y008a             |
| 4 | <i>I would want this on the day at the time as you would if you were going for anything to your doctors, so that you can use it as a, a refer to for whatever treatment you've then got to follow when you get home.</i><br>Y005a                                                                                                                                                                                                                                                                               |
| 5 | <i>Um (pause) probably before they have the baby, I think, because when you've just had a baby and you're all over the place and your life is completely turned upside down and then you have to take your sleep deprived self and the baby at eight weeks to have their first vaccination, I think, you know, even if people don't read it, when they go to antenatal classes or the midwife gives them it, I think you're more likely when you're pregnant to have</i>                                        |

|  |                                                                                                                 |
|--|-----------------------------------------------------------------------------------------------------------------|
|  | <i>the time to do it, especially when it's your first baby, when you're more focused on just that.</i><br>L001a |
|--|-----------------------------------------------------------------------------------------------------------------|

## DISCUSSION

This study explored parents' knowledge of and attitudes to MenB disease and of MenB vaccine to inform (a) the introduction of the MenB vaccine into the childhood schedule and (b) the information materials developed by Public Health England. To our knowledge this is the only *current* UK study providing detailed, up-to-date information for PHE and primary care health professionals to facilitate the successful implementation of MenB vaccine. We aimed to capture the views of parents across the two broad categories of parental factors that influence uptake of childhood vaccination (socio-economic disadvantage, concerned about safety or necessity of vaccines)[13-18]. Although the proportion of parents in this study with a university degree (55%) was higher than the proportion reported nationally for a comparable age group (about 40%),[21] diversity was achieved in other factors which are associated with uptake of childhood vaccination namely ethnicity, parental age and number of children. With the exception of one mother, the parents self-reported to be full or partial immunisers, reflecting the parents most likely to attend for MenB vaccination. Nationally, an estimated 1-2% of parents are active objectors to immunisation[22] which is consistent with the inclusion of one parent in this study. Finally we investigated similarities and differences in views across parents of different education, ethnicity and number of children; and only identified a small number of differing views according to the number of children a parent had.

Although most of the parents surveyed were not familiar with the term meningococcal disease, they recognised meningitis and septicaemia to be serious, life threatening conditions. In their consideration of MenB it was clear that for these parents, trusting the NHS and by definition health professionals, is a key influence on their acceptance of vaccines, a finding that has been reported elsewhere repeatedly.[23,24] This was evident in the view expressed by many parents that they will accept new vaccines or changes to the schedule because they trust the NHS to make evidence-based decisions and in particular that vaccines have been appropriately tried and tested. This also appeared to be the case for fever, if pre-warned that this is a likely consequence of MenB

1 vaccine, most would not be deterred from accepting the vaccine. Advising parents of the likely  
2  
3 adverse events following a vaccine is an important part of the immunisation process. Vaccine  
4  
5 safety is a top priority for parents and if prepared for side effects with advice on their management,  
6  
7 they are likely to be less concerned. This was borne out in one trial of MenB vaccine which  
8  
9 included cohorts of parents who either knew or did not know which vaccines their child was  
10  
11 receiving. Medical attention rates for fever were lower among parents who knew their child was  
12  
13 receiving MenB vaccine, underlining the importance of advising parents about the possibility of  
14  
15 fever following this vaccine.[25]  
16  
17

18  
19  
20 Some, mainly, US studies, have reported increased vaccine hesitancy among parents, partly in  
21  
22 response to increasing numbers of vaccines offered.[26] Although we found little evidence for this  
23  
24 in our study, there appears to be room to improve some elements of immunisation provision. For  
25  
26 example, some mothers reported feeling pressurised into accepting vaccines and first time  
27  
28 mothers in particular found the process stressful. Health professionals may need reminding that  
29  
30 the nature of their interactions is a key factor in influencing a parent's attitudes to immunisation[27]  
31  
32 this includes not assuming that attendance for immunisation indicates parents have no questions  
33  
34 or concerns. Making this assumption or lacking empathy about parents' distress over the pain their  
35  
36 child is experiencing may lead to future defaulting.[28] This is particularly important with the  
37  
38 introduction of MenB vaccine, when infants will be given three injections at their first immunisation  
39  
40 visit at eight weeks of age.  
41  
42

43  
44 In contrast, it has also been reported that health professionals may over-estimate parents'  
45  
46 concerns about their child receiving multiple injections.[9] Although some parents in our study  
47  
48 expressed concern about the pain and distress and possible impact on their child's immune system  
49  
50 of having an additional injection, most felt this was outweighed by the value of protection against  
51  
52 such a serious infection. MenB's introduction will have led to some initial queries or concerns from  
53  
54 both health professionals and parents about the need for an additional injection, but experience  
55  
56 from the introduction of other vaccines suggests that it quickly becomes acceptable practice[9]  
57  
58  
59  
60

1  
2 underlining again the importance of a positive recommendation from a confident, well informed  
3  
4 health professional in securing parental acceptance of vaccines.[9]  
5  
6

7  
8 MenB vaccine is another significant milestone in the prevention of bacterial meningitis and  
9  
10 septicaemia. Our findings mirror those from other studies conducted in Europe[29-31] and  
11  
12 Australia[32] and suggest that MenB vaccine will prove acceptable to parents. Only one other  
13  
14 study explicitly explored the hypothetical impact on vaccine acceptance of an increased risk of mild  
15  
16 to moderate fever associated with the vaccine and reported that it reduced intent to immunise for  
17  
18 only a small proportion.[32] The recommendation to give prophylactic paracetamol after the MenB  
19  
20 doses at two and four months represents a change in advice with potential for confusion. Most  
21  
22 parents in our study reported that despite some concerns, if advised to do so they would be likely  
23  
24 to administer paracetamol. However, some may be reluctant and health professionals need to be  
25  
26 equipped to discuss this issue with parents. It will be important to monitor the side effects of MenB  
27  
28 vaccine on a population level and whether increased rates of fever affect uptake of the vaccine or  
29  
30 attendance rates in primary care and Accident and Emergency.  
31  
32

33  
34 The successful implementation of the MenB vaccination programme requires increased awareness  
35  
36 among parents of the infection, the safety and effectiveness of the vaccine, the likelihood of fever  
37  
38 and its management if given concomitantly with other vaccines and the safety of giving multiple  
39  
40 vaccines. Although we did not identify any new issues for parents in this study regarding vaccines,  
41  
42 it was still important to explore their views and to consider their information needs. PHE developed  
43  
44 written information for parents, which was informed by our findings.[33-35] Resources to support  
45  
46 the introduction of the vaccine were also developed for health professionals.[36] Our findings  
47  
48 provided reassurance about the acceptability of MenB vaccine for parents and this has been borne  
49  
50 out by preliminary vaccine coverage data at six months of age published in February 2016[37]  
51  
52 which indicates the vaccine has been successfully integrated into the national programme.  
53  
54

## 55 56 **Acknowledgments** 57 58 59 60

1 Our thanks go to the Children's Centres, mother and toddler groups and the midwife who facilitated  
2 recruitment to the study. We are also grateful to the parents who gave up their time to participate.  
3  
4  
5  
6

### 7 **Footnotes**

#### 8 **Contributors**

9  
10 JY and VS conceived the study. All authors were responsible for the development and refinement  
11 of the study protocol. CJ and HB conducted all data collection and data analysis. CJ and HB  
12 drafted the manuscript. All authors contributed to the revisions and approved the final manuscript.  
13  
14 All authors agree to be accountable for all aspects of the work.  
15  
16  
17  
18  
19

#### 20 **Funding**

21  
22 This work was supported by Public Health England. The study funders were involved in the study  
23 conception, design, interpretation of data, writing of the article and decision to submit the article for  
24 publication. They did not contribute to data collection or data analysis. The research team operated  
25 completely independently of the funders in data collection and data analysis.  
26  
27  
28  
29  
30  
31  
32

#### 33 **Competing Interests**

34  
35  
36 None  
37  
38  
39

#### 40 **Data sharing**

41  
42 There are no unpublished data available.  
43  
44  
45  
46  
47  
48  
49  
50  
51  
52  
53  
54  
55  
56  
57  
58  
59  
60

## References

- [1] Borrow R, Abad R, Trotter C, van der Klis FR, Vazquez JA. Effectiveness of meningococcal serogroup C vaccine programmes. *Vaccine* 2013;31:4477-86.
- [2] Ladhani SN, Flood JS, Ramsay ME, Campbell H, Gray SJ, Kaczmarski EB et al. Invasive meningococcal disease in England and Wales: implications for the introduction of new vaccines. *Vaccine* 2012;30:3710-6.
- [3] NHS England, Public Health England. Introduction of MenB Immunisation for infants. London: NHS England; 2015.  
[https://www.gov.uk/government/uploads/system/uploads/attachment\\_data/file/437906/150622\\_Me nB\\_bipartite\\_letter.pdf](https://www.gov.uk/government/uploads/system/uploads/attachment_data/file/437906/150622_Me nB_bipartite_letter.pdf) (accessed 06/05/16)
- [4] Bedford H, Lansley M. More vaccines for children? Parents' views. *Vaccine* 2007;25:7818-23.
- [5] Peckham C, Bedford H, Senturia Y, Ades A. National immunisation study: Factors influencing immunisation uptake in childhood. Horsham: Action Research for the Crippled Children; 1989.
- [6] de Wals P. Results of a mass immunisation campaign with 4-components serogroup b meningococcal vaccine (4CMenB) in Quebec, Canada .Oral Presentations at Meningitis Research Foundation Conference, London; 2015. <http://www.meningitis.org/conference2015#Wals> (accessed 06/05/16)
- [7] Gossger N, Snape MD, Yu L-M, Finn A, Bona G, Esposito S et al. Immunogenicity and tolerability of recombinant serogroup B meningococcal vaccine administered with or without routine infant vaccinations according to different immunization schedules: a randomized controlled trial. *JAMA* 2012;307:573-82.
- [8] World Health Organisation. Multiple Injections: Protecting Infants as Soon as Possible. Multiple Injections: Acceptability and Safety. Geneva: World Health Organisation; 2014.  
[http://www.who.int/immunization/diseases/poliomyelitis/inactivated\\_polio\\_vaccine/multiple\\_injections\\_acceptability\\_safety.pdf](http://www.who.int/immunization/diseases/poliomyelitis/inactivated_polio_vaccine/multiple_injections_acceptability_safety.pdf) (accessed 06/05/16)
- [9] Wallace AS, Mantel C, Mayers G, Mansoor, O, Gindler, JS, Hyde, TB. Experiences with provider and parental attitudes and practices regarding the administration of multiple injections during infant vaccination visits: lessons for vaccine introduction. *Vaccine* 2014;32:5301-10.



- 1  
2 [10] Smith PJ, Humiston SG, Marcuse EK, Zhao Z, Dorell CG, Howes C et al. Parental delay or  
3 refusal of vaccine doses, childhood vaccination coverage at 24 months of age, and the Health  
4 Belief Model. *Public Health Rep* 2011;126(Suppl 2):135.  
5  
6  
7 [11] Public Health England. Immunisation against Infectious Diseases. Chapter 8: Vaccine safety  
8 and the management of adverse events following immunisation (Page 56). London: Public Health  
9 England; 2014.  
10  
11 [https://www.gov.uk/government/uploads/system/uploads/attachment\\_data/file/147868/Green-](https://www.gov.uk/government/uploads/system/uploads/attachment_data/file/147868/Green-Book-Chapter-8-v4_0.pdf)  
12 [Book-Chapter-8-v4\\_0.pdf](https://www.gov.uk/government/uploads/system/uploads/attachment_data/file/147868/Green-Book-Chapter-8-v4_0.pdf) (accessed 06/05/16)  
13  
14  
15 [12] Purssell E. Parental fever phobia and its evolutionary correlates. *J Clin Nurs* 2009;18:210-8.  
16  
17 [13] Kai J. What worries parents when their preschool children are acutely ill, and why: a qualitative  
18 study. *BMJ* 1996;313:983-6.  
19  
20 [14] Falagas ME, Zarkadoulia E. Factors associated with suboptimal compliance to vaccinations in  
21 children in developed countries: a systematic review. *Curr Med Res Opin* 2008;24:1719-41.  
22  
23 [15] Brown KF, Kroll JS, Hudson MJ, Ramsay M, Green J, Long SJ et al. Factors underlying  
24 parental decisions about combination childhood vaccinations including MMR: a systematic review.  
25 *Vaccine* 2010;28:4235-48.  
26  
27 [16] Tickner S, Leman PJ, Woodcock A. Factors underlying suboptimal childhood immunisation.  
28 *Vaccine* 2006;24:7030-6.  
29  
30 [17] Samad L, Tate AR, Dezateux C, Peckham C, Butler N, Bedford H. Differences in risk factors  
31 for partial and no immunisation in the first year of life: prospective cohort study. *BMJ*  
32 2006;332:1312-3.  
33  
34 [18] Mills E, Jadad AR, Ross C, Wilson K. Systematic review of qualitative studies exploring  
35 parental beliefs and attitudes toward childhood vaccination identifies common barriers to  
36 vaccination. *J Clin Epidemiol* 2005;58:1081-8.  
37  
38 [19] Larson HJ, Jarrett C, Eckersberger E, Smith DM, Paterson P. Understanding vaccine  
39 hesitancy around vaccines and vaccination from a global perspective: A systematic review of  
40 published literature, 2007–2012. *Vaccine* 2014;32:2150-9.  
41  
42 [20] Braun V, Clarke V. Using thematic analysis in psychology. *Qual Res Psycho* 2006;3:77-101.  
43  
44  
45  
46  
47  
48  
49  
50  
51  
52  
53  
54  
55  
56  
57  
58  
59  
60



1 [21] Office for National Statistics. 2011 Census Analysis, Local Area Analysis of Qualifications  
2 Across England and Wales 2014. London: ONS. [http://www.ons.gov.uk/ons/rel/census/2011-  
4 census-analysis/local-area-analysis-of-qualifications-across-england-and-wales/index.html](http://www.ons.gov.uk/ons/rel/census/2011-<br/>3 census-analysis/local-area-analysis-of-qualifications-across-england-and-wales/index.html)  
5  
6

7 (accessed 06/05/16)  
8

9 [22] Samad L, Butler N, Peckham C, Bedford H. Incomplete immunisation uptake in infancy:  
10 Maternal reasons. *Vaccine* 2006;24:6823-9.  
11

12 [23] Benin AL, Wisler-Scher DJ, Colson E, Shapiro ED, Holmboe ES. Qualitative analysis of  
13 mothers' decision-making about vaccines for infants: the importance of trust. *Pediatrics*  
14 2006;117:1532-41.  
15  
16  
17  
18

19 [24] Larson HJ, Cooper LZ, Eskola J, Katz SL, Ratzan S. Addressing the vaccine confidence gap.  
20 *Lancet* 2011;378:526-35.  
21  
22

23 [25] Vesikari T, Esposito S, Prymula R, Ypma E, Kohl I, Toneatto D et al. Immunogenicity and  
24 safety of an investigational multicomponent, recombinant, meningococcal serogroup B vaccine  
25 (4CMenB) administered concomitantly with routine infant and child vaccinations: results of two  
26 randomised trials. *Lancet* 2013;381:825-35.  
27  
28  
29

30 [26] Dubé E, Laberge C, Guay M, Bramadat P, Roy R, Bettinger J. Vaccine hesitancy: An  
31 overview. *Hum Vaccin Immunother* 2013;9:1763-73.  
32  
33

34 [27] Leask J, Kinnersley P, Jackson C, Cheater F, Bedford H, Rowles G. Communicating with  
35 parents about vaccination: a framework for health professionals. *BMC Pediatr* 2012;12:154.  
36  
37

38 [28] Harrington PM, Woodman C, Shannon WF. Low immunisation uptake: Is the process the  
39 problem? *J Epidemiol Community Health* 2000;54:394-400.  
40  
41

42 [29] Le Ngoc Tho S, Ader F, Ferry T, Floret D, Arnal M et al. Vaccination against serogroup B  
43 *Neisseria meningitidis*: Perceptions and attitudes of parents. *Vaccine* 2015;33:3463-70.  
44  
45

46 [30] Bakhache P, Rodrigo C, Davie S, Ahuja A, Sudovar B, Crudup T et al. Health care providers'  
47 and parents' attitudes toward administration of new infant vaccines—a multinational survey. *Euro J*  
48 *Pediatr* 2013;172:485-92.  
49  
50  
51

52 [31] Mameli C, Faccini M, Mazzali C, Picca M, Colella G, Duca PG et al. Acceptability of  
53 meningococcal serogroup B vaccine among parents and health care workers in Italy: A survey.  
54 *Hum Vaccin Immunother* 2014;10:3004-10.  
55  
56  
57  
58  
59  
60

1 [32] Marshall H, Clarke M, Sullivan T. Parental and community acceptance of the benefits and risks  
2 associated with meningococcal B vaccines. *Vaccine* 2014;32:338-44.  
3

4 [33] Public Health England. A 3 Minute Guide: Protecting your baby against meningitis and  
5 septicaemia. Secondary A 3 Minute Guide: Protecting your baby against meningitis and  
6 septicaemia. London: Public Health England; 2015.  
7

8 [https://www.gov.uk/government/uploads/system/uploads/attachment\\_data/file/448028/9183\\_MenB-  
10 -DL\\_3\\_Min\\_guide\\_17\\_web.pdf](https://www.gov.uk/government/uploads/system/uploads/attachment_data/file/448028/9183_MenB-<br/>9 -DL_3_Min_guide_17_web.pdf). (accessed 06/05/16)  
11

12 [34] Public Health England. Protecting your baby against meningitis and septicaemia caused by  
13 meningococcal B bacteria. London: Public Health England; 2015.  
14

15 [https://www.gov.uk/government/uploads/system/uploads/attachment\\_data/file/448054/9133\\_menB-  
17 \\_A5\\_Leaflet\\_17\\_web.pdf](https://www.gov.uk/government/uploads/system/uploads/attachment_data/file/448054/9133_menB-<br/>16 _A5_Leaflet_17_web.pdf) (accessed 06/05/16)  
18

19 [35] Public Health England. Using Paracetamol to prevent and treat fever after MenB vaccination.  
20 London: Public Health England; 2015.  
21

22 [https://www.gov.uk/government/uploads/system/uploads/attachment\\_data/file/450890/9413-  
24 paracetamol-menB-2page-A4-05-web.pdf](https://www.gov.uk/government/uploads/system/uploads/attachment_data/file/450890/9413-<br/>23 paracetamol-menB-2page-A4-05-web.pdf) (accessed 06/05/16)  
25

26 [36] Public Health England. Meningococcal B (MenB) vaccination programme. London: Public  
27 Health England; 2015. [https://www.gov.uk/government/collections/meningococcal-b-menb-  
29 vaccination-programme](https://www.gov.uk/government/collections/meningococcal-b-menb-<br/>28 vaccination-programme). (accessed 06/05/16)  
30

31 [37] Public Health England. Provisional vaccine coverage estimates for the new meningococcal B  
32 (MenB) immunisation programme for England, January 2016. *Health Protection Report*; 10 (8), 26  
33 February 2016.  
34

35 [https://www.gov.uk/government/uploads/system/uploads/attachment\\_data/file/503440/hpr0816\\_me-  
37 nb-vc.pdf](https://www.gov.uk/government/uploads/system/uploads/attachment_data/file/503440/hpr0816_me-<br/>36 nb-vc.pdf) (accessed 06/05/16)  
38  
39  
40  
41  
42  
43  
44  
45  
46  
47  
48  
49  
50  
51  
52  
53  
54  
55  
56  
57  
58  
59  
60

## TOPIC GUIDE FOR INTERVIEWS

### Process

Interviews will use the following format:

1. **Information Sheet and Consent Form:** Confirm that the participant has read and understood the Participant Information Sheet. Provide the opportunity for the participant to ask any further questions about the interview. Participant completes two copies of the consent form.
2. **Interview:** Ask questions below.
3. **Debrief, Participant Background Information Sheet, Gift Voucher and Contact Details form:** Debrief Participant. Complete *Participant Background Information Sheet*. Provide gift voucher. Participant signs *receipt for gift voucher*. Participant completes *Contact Details form* (if have consented).

### Interview

#### 1. Introductions and Attitudes to Vaccination in general

Name of researcher, name of participant(s) – if a group interview then researcher to state who is sitting where (to aid transcription)

First I would like to ask you your views about vaccinations/immunisation for children

What do you think in general about vaccinations for children?

*Prompt*

- Good/bad thing – why?
- Are there any vaccines in particular about which you have different views?

What do you think about the schedule for childhood vaccines? So this is the timings of doses and of the number of vaccines given

*Prompt*

- OK/busy – why?

Are you aware that the schedule changes from time to time, a new vaccine may be added, the number of doses increased or even doses removed?

Why do you think the schedule changes?

*Prompt*

- New vaccines / Vaccines removed / Different timings / More or fewer doses

What do you think about these changes?

*Prompt*

- Good/bad thing – why?

## 2. Meningococcal B Disease and Vaccine

Have you heard of meningococcal disease? What do you know about it?

*Prompt*

- How is it spread?
- What types of infection does it cause? (meningitis, septicaemia)
- What do you know about meningitis/septicaemia?
- Are there any vaccines in the schedule that protect against meningococcal disease? Which ones?

Have you heard about meningococcal B disease? (MenB)

*Prompt*

- How common is it? / Who is most likely to get it?
- What are the symptoms? (how would you recognise meningitis/septicaemia?)
- What are the risks to young children?
- How does it differ from Men C disease?

Have you heard about the MenB vaccine? What do you know?

*Prompt*

- Immunise at 2, 4 and booster at 12 months (catch up 3, 4 months – only 2 doses if 4 months)
- How does it differ (or not) to Men C vaccine?
- Safety

MenB vaccine has been developed and licensed and at the moment the Dept of Health are deciding whether to introduce it for all children. If the vaccine was introduced:

- What information would you want to be included about *MenB disease* in a leaflet for parents?
- What information would you want to be included about the *MenB vaccine* in a leaflet for parents?

If MenB is given with other vaccines there is an increased risk of fever. How you do feel about fever in your young child - How confident are you in managing fever?

*Prompt*

- Do you worry about it?
- When and why?
- Is it the level (i.e. 39 degrees) / Length of time it lasts? / Discomfort / Worry about fits / brain damage / Masking another illness

How do you manage it?

- When would you seek professional advice – when/from where?

1 The advice is that you give your child paracetamol (sachet) after the first 2 doses (2 and 4 months). You  
2 would be advised to administer this at home (3 times), 1. as soon as possible after the jab, 2. 6-8 hours  
3 later 3. and again 6-8 hours later. This reduces the likelihood of fever without affecting how well the  
4 vaccine works.  
5  
6  
7

8 What do you think about the need to give your child paracetamol after the MenB vaccination?  
9

10 *Prompt*

- 11 • Is it a concern to you – why/why not?
- 12 • Would you do it? (what if no sign of fever?)  
13  
14  
15

16 The GP practice will provide 1 paracetamol dose in a sachet. You need to provide the other 2 doses  
17 yourself.  
18

19 *Prompt*

- 20 • What do you think about that?
- 21 • Do you have paracetamol for children at home?
- 22 • Is it a concern to you – why/why not?  
23  
24  
25  
26

27 What information would you want to be included about *fever after MenB vaccine and paracetamol* in a  
28 leaflet for parents?  
29  
30

31 Would you have the MenB vaccine if it was offered?  
32

33 *Prompt*

- 34 • Would you consider not having the other vaccines at that time point so that your child can have  
35 MenB without the increased risk of fever? Why / why not?  
36  
37  
38

### 39 **3. Delivery of MenB vaccine**

40  
41  
42 When the MenB vaccine is introduced, this will mean that children will have more injections in one visit (3  
43 instead of 2 at both 2 months and 4 months – N.B. until recently they had 3 injections at 4-month visit but  
44 that dose of Men C is removed from schedule now). What do you think about that?  
45  
46

- 47 • Is it a concern to you – why/why not?  
48  
49

50 Given that the risk of fever is increased when MenB is given with other vaccines, how would you prefer  
51 to have it? Why? (i.e. about ¼ get fever with MenB alone, about ¼ with other vaccines alone, but ½ get  
52 fever with MenB AND other vaccines) – the level of fever is no higher than with other vaccines, just more  
53 likely to get it.  
54  
55

- 56 • At the same time (when fever is likely)
- 57 • At a separate visit?  
58  
59  
60

1 At the 12 month visit, it will mean 4 vaccines are given – what would you prefer? Why?

- 2 • 2 visits with 2 injections at each visit / 3 and 1 / all 4 in one visit
- 3
- 4

5 What information would you want to be included about the *number of injections per visit* in a leaflet?

6

7

#### 8 **4. Drafts of Materials**

9

10 Finally, thinking about what we have discussed so far about MenB, I would like you to now look at the 3

11 leaflets and let me know what you think.

12

13

14 Go through leaflets in turn, page by page (vary order look at them)

15

- 16 • 2 minutes guide to MenB
- 17 • MenB full leaflet
- 18 • Paracetamol
- 19
- 20
- 21
- 22 • What is the most important thing for you to know from this leaflet? (what is next most important etc.?)
- 23 • What is less important?
- 24 • Should information for the MenB and C vaccines be combined – why/why not?
- 25 • How do you like the information to be presented – bullet points/pictures/how much detail
- 26 • Precise wording
- 27 • Q&A format
- 28
- 29
- 30
- 31
- 32
- 33

#### 34 **5. Off label vaccines**

35 What do you think about 'off label' vaccines (it is licenced for different patients/conditions?)

36

37 *Prompt*

- 38 • Would you let your child have an 'off label' vaccine? Why/why not?
- 39 • Any particular circumstances?
- 40
- 41
- 42

#### 43 **6. Final Comments**

44 Is there anything else about MenB or childhood vaccines more generally that you want to tell me before

45 we finish?

46

47

48

49

50

51

52

53

54

55

56

57

58

59

60

# BMJ Open

## UK parents' attitudes to meningococcal group B (MenB) vaccination: A qualitative analysis

|                                 |                                                                                                                                                                                           |
|---------------------------------|-------------------------------------------------------------------------------------------------------------------------------------------------------------------------------------------|
| Journal:                        | <i>BMJ Open</i>                                                                                                                                                                           |
| Manuscript ID                   | bmjopen-2016-012851.R1                                                                                                                                                                    |
| Article Type:                   | Research                                                                                                                                                                                  |
| Date Submitted by the Author:   | 01-Feb-2017                                                                                                                                                                               |
| Complete List of Authors:       | Jackson, Cath; University of York, York Trials Unit<br>Yarwood, Joanne; Public Health England<br>Saliba, Vanessa; Public Health England<br>Bedford, Helen; UCL, Institute of Child Health |
| <b>Primary Subject Heading</b>: | Immunology (including allergy)                                                                                                                                                            |
| Secondary Subject Heading:      | Public health, Health services research, Qualitative research                                                                                                                             |
| Keywords:                       | MenB, meningococcal, vaccination, immunisation, immunization                                                                                                                              |
|                                 |                                                                                                                                                                                           |

SCHOLARONE™  
Manuscripts

1 **UK parents' attitudes towards meningococcal group B (MenB) vaccination: A qualitative**  
2  
3 **analysis**  
4  
5  
6

7 Cath Jackson<sup>1</sup>, Joanne Yarwood<sup>2</sup>, Vanessa Saliba<sup>2</sup>, Helen Bedford<sup>3</sup>  
8  
9

10  
11 <sup>1</sup>Department of Health Sciences, University of York, York, UK  
12

13 <sup>2</sup>Public Health England, London, UK  
14

15 <sup>3</sup>Institute of Child Health, UCL, London, UK  
16  
17  
18  
19

20 Corresponding author:  
21

22 Helen Bedford, Professor, UCL Great Ormond Street Institute of Child Health, 30 Guilford Street  
23

24 London, WC1N 1EH [h.bedford@ucl.ac.uk](mailto:h.bedford@ucl.ac.uk) Tel. 020 7905 2333  
25  
26  
27

28 Key words: MenB, meningococcal, vaccination, immunisation, immunization  
29

30 Word count: 4451  
31  
32  
33  
34  
35  
36  
37  
38  
39  
40  
41  
42  
43  
44  
45  
46  
47  
48  
49  
50  
51  
52  
53  
54  
55  
56  
57  
58  
59  
60



**ABSTRACT**

**Objectives:** (1) To explore existing knowledge of, and attitudes, to group B meningococcal disease and MenB vaccine among parents of young children. (2) To seek views on their information needs.

**Design:** Cross-sectional qualitative study using individual and group interviews conducted in February and March 2015, prior to the introduction of serogroup B meningococcal (MenB) vaccine (Bexsero®) into the UK childhood immunisation schedule.

**Setting:** Community centres, mother and toddler groups, parents' homes and workplaces in London and Yorkshire.

**Participants:** 60 parents of children under two years of age recruited via mother and baby groups and via an advert posted to a midwife-led Facebook group.

**Results:** Although recognising the severity of meningitis and septicaemia, parents' knowledge of group B meningococcal disease and MenB vaccine was poor. Whilst nervous about fever, most said they would take their child for MenB vaccination despite its link to fever. Most parents had liquid paracetamol at home, many were willing to administer it after MenB vaccination as a preventive measure as advised although concerns were also raised. There were mixed views on the acceptability of four vaccinations at the 12-month booster visit; some preferred one visit whilst others favoured spreading the vaccines over two visits. Parents were clear on the information they required before attending the immunisation appointment.

**Conclusions:** The successful implementation of the MenB vaccination programme depends on its acceptance by parents. In view of parents' recognition of the severity of meningitis and septicaemia, and successful introduction of other vaccines to prevent bacterial meningitis and septicaemia, the MenB vaccination programme is likely to be successful. However, the need for additional injections, the likelihood of post immunisation fever and its management are issues

1  
2  
3  
4  
5  
6  
7  
8  
9  
10  
11  
12  
13  
14  
15  
16  
17  
18  
19  
20  
21  
22  
23  
24  
25  
26  
27  
28  
29  
30  
31  
32  
33  
34  
35  
36  
37  
38  
39  
40  
41  
42  
43  
44  
45  
46  
47  
48  
49  
50  
51  
52  
53  
54  
55  
56  
57  
58  
59  
60

about which parents will need information and reassurance from health professionals. Public Health England has developed written information for parents, informed by these findings.

For peer review only

### Strengths and limitations of this study

- This is the only current UK study providing detailed, up-to-date information for Public Health England and primary care health professionals to facilitate the successful implementation of MenB vaccine.
- A mix of parents across parental age, ethnicity and number of children were recruited, these parental characteristics are associated with uptake of childhood vaccination.
- Parents with a university degree or fully-immunised children were over represented in the study.

For peer review only

## UK parents' attitudes to meningococcal group B (MenB) vaccination: A qualitative analysis

### INTRODUCTION

Following the successful introduction of meningococcal C (MenC) vaccine in 1999;[1] serogroup B is the leading cause of meningococcal disease in the UK accounting for 85-90% of all cases and with the highest incidence in infants.[2] In September 2015, the UK introduced routine meningococcal B vaccination (MenB) into the childhood immunisation schedule at two, four and 12 months of age.[3]

The successful implementation of vaccines depends on many factors including parental acceptability. Since meningitis is recognised by parents to be a serious, potentially life threatening infection[4] and the perceived severity of an infection is an important determinant of vaccine acceptance,[5] the prospects for a successful MenB programme are good. However, the introduction of MenB vaccine raises specific issues which may impact on its acceptability for some parents and which need addressing to ensure successful implementation. First, although MenB is well evaluated in trials and in campaigns[6, 7] the UK is the first country to introduce Bexsero (a specific MenB vaccine) as a publically funded programme to help prevent group B meningococcal disease. Second, more injections are needed: a total of three at the two and four month vaccination visits and four at the 12-month visit. Endorsement by health professionals plays an important role in parent acceptance of multiple injections; [8, 9] however an increasing number of vaccines and multiple injections offered routinely concerns some parents who feel, albeit misguidedly, that too many vaccines may overwhelm their child's immune system.[4] Parents also worry about increased pain and possible adverse events following multiple injections.[9] In the USA, where more vaccines and vaccine doses are recommended, some parents are reported to delay or even decline vaccines.[10] In view of some existing parental concern about the number of vaccines already recommended, there is the potential for this to be mirrored in the UK. Third, when MenB vaccine is administered to infants concomitantly with other vaccines it gives rise to higher levels (51%-61%) of fever ( $\geq 38^{\circ}\text{C}$ ) compared to routine vaccines given alone (23%).[7] To reduce this risk, the Joint Committee on Vaccination and Immunisation recommended that when MenB vaccine is given with the other vaccines at two and four months of age, parents should be advised

1 to administer paracetamol prophylactically.[3] This represents a change in advice on managing  
2 fever, based on National Institute for Health and Care Excellence guidance, that anti-pyretics  
3 should not be given in anticipation of a fever and only if a child appears distressed.[11] Since fever  
4 is also a concern for parents,[12, 13] they will be required to consider the balance of risks between  
5 the threat of meningitis and the likelihood of fever following the vaccine.  
6  
7  
8  
9  
10

11 We aimed to explore parents' knowledge of, and attitudes to, MenB disease and MenB vaccine.  
12 We also sought views on their information needs which included commenting on the content of  
13 communications developed by Public Health England (PHE). These comments are not presented  
14 here as they were fed back directly to PHE.  
15  
16  
17  
18  
19  
20  
21  
22  
23

## 24 **METHODS**

### 25 **Study design**

26 This was a cross-sectional qualitative study.  
27  
28  
29  
30  
31

### 32 **Participants and Recruitment**

33 A large body of literature[14-19], identifies two broad categories of parental factors influencing  
34 uptake of childhood vaccination. The first relates to socioeconomic disadvantage where, despite  
35 being motivated to have their children vaccinated, parents lack access to resources and support to  
36 overcome logistical barriers such as no private transport (access). The second relates to parents'  
37 concerns about the safety or beliefs about the necessity of vaccines (acceptance). To ensure that  
38 we spoke with parents in both categories, we set out to recruit 60 parents of children under the age  
39 of two years across different parental age, socio-economic status (using education as a proxy),  
40 ethnicity and number of children. Parents were recruited in London and Yorkshire. In two London  
41 districts, selected for their socio-demographic mix, parents were recruited through five Children's  
42 Centres (CC). Written permission was secured to conduct the study in these CCs. HB attended  
43 mother and baby sessions in the CCs and distributed study information to parents, returning a  
44 week later to conduct interviews with consenting parents. In Yorkshire, parents were recruited from  
45 two mother and toddler groups (after securing permission from group leaders) by distributing study  
46  
47  
48  
49  
50  
51  
52  
53  
54  
55  
56  
57  
58  
59  
60

1 information and via an advert posted to a midwife-led Facebook group. Interested mothers  
2  
3 contacted CJ for more information and interviews were conducted subsequently. We did not  
4  
5 formally record how many parents were approached and then agreed/declined to be interviewed.  
6  
7

### 8 9 10 **Data Collection**

11 Individual and group interviews were conducted by CJ and HB in February and March 2015 prior to  
12  
13 the announcement of the introduction of MenB vaccine. Both have considerable experience as  
14  
15 immunisation researchers; and HB was previously a health visitor. They presented themselves to  
16  
17 participants as independent to the MenB vaccination programme and advised that any specific  
18  
19 questions about immunisation would be answered after the interviews. The written study  
20  
21 information reassured parents that they could end/leave the interview at any point without offering  
22  
23 a reason why. Parents who individually contacted the research team to participate were  
24  
25 interviewed on their own in their home or workplace. Parents recruited through the CCs and  
26  
27 mother and toddler groups took part in group interviews conducted away from the main mother and  
28  
29 baby session. The topic guide (see Supplementary File 1) was piloted with four parents of children  
30  
31 under the age of two years. No changes were made. Interviews explored awareness of MenB  
32  
33 disease and vaccine, perceptions of fever generally and attitudes to use of paracetamol as a  
34  
35 prophylactic. Attitudes to an increased number of injections were discussed and preferences for  
36  
37 the number at each vaccination visit explored. Finally, parents described the information they  
38  
39 considered to be most important for inclusion in MenB leaflets. In the group interviews the  
40  
41 researcher asked participants in turn to respond to the interview questions.  
42  
43  
44  
45

46 Individual interviews lasted between 28 and 57 minutes. Group interviews lasted between 30 and  
47  
48 65 minutes. All interviews were digitally audio-recorded.  
49

### 50 51 52 **Data Analysis**

53 The audio-recordings were transcribed verbatim and personal data anonymised. The individual  
54  
55 and group interview data were analysed together using the six steps of thematic analysis. This is a  
56  
57 method of 'identifying, analysing and reporting patterns (themes) within the data'. [20 p4] It is a  
58  
59  
60

1  
2 useful approach for producing qualitative analyses suited to informing programme development.

3  
4 The six steps were as follows:

- 5 • Familiarisation: Both researchers (CJ and HB) became immersed in the raw data by 'repeated  
6 reading' of the transcripts and listed key ideas for coding.
- 7  
8 • Generating initial codes: Initial codes and a coding framework were developed by CJ, informed  
9 predominantly by the study objectives (a deductive approach), although novel views expressed  
10 by participants were also captured (an inductive approach). The interview data were then  
11 coded by CJ to this framework using Nvivo Version 10 software.
- 12  
13 • Searching for themes: The codes were then organised by CJ into potential themes and  
14 subthemes. At this point similarities and differences in views across education, ethnicity and  
15 number of children were explored.
- 16  
17 • Reviewing themes: The coded data within each potential theme were reviewed by CJ and HB  
18 and the themes modified to ensure that they formed a coherent pattern. Each theme was then  
19 reviewed to see if it 'worked' in relation to the entire data set.
- 20  
21 • Defining and naming themes: A short paragraph was produced by CJ for each theme and  
22 subthemes to define the 'essence' of the theme/subthemes and names were allocated.
- 23  
24 • Producing the report: The thematic analysis was written up by CJ.
- 25  
26  
27  
28  
29  
30  
31  
32  
33  
34  
35  
36  
37

### 38 **Ethics approval**

39 University College London Research Ethics Committee approved the study and parents gave  
40 written informed consent to take part.  
41  
42  
43  
44  
45

## 46 **FINDINGS**

### 47 **Participants**

48 Information was gathered from 60 parents (Table 1) through seven individual and 12 group  
49 interviews (range 2-7 parents). Whilst the sample size was pre-specified data saturation occurred  
50 in that no new relevant knowledge emerged in the final few interviews. Two thirds (62%) lived in  
51 London and one third (38%) were from Yorkshire. Participants were predominantly female (92%)  
52 and two thirds (65%) were first time parents. Their age range was 20-43 years. Half were White  
53  
54  
55  
56  
57  
58  
59  
60

1 British (55%). Half (55%) were educated to Bachelor degree or higher. Two parents were medically  
 2 trained. Participants' children (n=62) ranged from 12 days to 24 months of age. Almost all  
 3  
 4 participants (92%) self-reported that their child/children were fully immunised.  
 5  
 6  
 7  
 8  
 9

10 **Table 1:** Parent characteristics

|                                               |                           | N  | %  |
|-----------------------------------------------|---------------------------|----|----|
| Site                                          | London                    | 37 | 62 |
|                                               | Yorkshire                 | 23 | 38 |
| Gender                                        | Male                      | 5  | 8  |
|                                               | Female                    | 55 | 92 |
| Ethnicity                                     | White British             | 33 | 55 |
|                                               | White Other               | 10 | 16 |
|                                               | Black British Caribbean   | 4  | 7  |
|                                               | Black African             | 5  | 8  |
|                                               | Asian Chinese             | 1  | 2  |
|                                               | Asian Other               | 4  | 7  |
|                                               | Missing                   | 3  | 5  |
| Highest Educational Qualification             | GSCE or equivalent        | 6  | 10 |
|                                               | A level or equivalent     | 15 | 25 |
|                                               | Bachelor degree or higher | 33 | 55 |
|                                               | Missing                   | 6  | 10 |
| No. Children                                  | One                       | 39 | 65 |
|                                               | More than one             | 20 | 33 |
|                                               | Missing                   | 1  | 2  |
| Self-reported Immunisation Status of Children | Full                      | 55 | 92 |
|                                               | Partial                   | 3  | 5  |
|                                               | None                      | 1  | 2  |



|                                             |                  |                   |
|---------------------------------------------|------------------|-------------------|
| Missing                                     | 1                | 2                 |
|                                             | <b>Mean (SD)</b> | <b>Range</b>      |
| Mean Age of Parent (years)                  | 31.6 (5.10)      | 20-43             |
| Mean Age of Children under 2 years (months) | 8.7 (5.60)       | 12 days-24 months |

## Parents' Views

We report findings based on thematic analysis of the data. Where views differ according to parents' characteristics these are indicated. Illustrative quotes are presented throughout.

### Views on MenB Disease and Vaccination

#### *Knowledge about MenB and Perception of Risk of the Disease*

Although most parents were unfamiliar with the term 'meningococcal disease', they had heard of meningitis, recognising it to be life threatening and needing urgent medical attention. They identified high temperature, fever and a rash (recognised using the glass test) as symptoms to look out for (Quote 1, Table 2). Parents were generally unsure of details of how meningococcal infection spreads, its incidence and who is most likely to catch it (Quote 2, Table 2). A minority of parents mentioned different strains (commonly C) but they were less aware of how strains differ, although it was suggested the difference was viral-bacterial or due to severity. Parents were generally less knowledgeable about septicaemia but knew it to be serious. Four parents who were well informed about both forms of meningococcal disease were either medically trained or had paid privately for their children to have the MenB vaccination.

#### *Knowledge of and Attitudes to MenB Vaccine*

Although some parents knew there were vaccines in the schedule to protect against meningococcal disease, most commonly mentioning MenC, most had not heard of MenB vaccine. Because of this parents did not initially identify any safety concerns associated with MenB vaccine, although a small minority talked about feeling nervous when a new vaccine is introduced and their concerns that it has been sufficiently tested (Quote 3, Table 2). The four parents who were well

informed about MenB disease were also knowledgeable about MenB vaccine although a GP had not yet heard about it in her professional role (Quote 4, Table 2).

**Table 2:** Illustrative Quotes – Knowledge of, and attitudes to, MenB disease and vaccination

|   |                                                                                                                                                                                                                                                                                                                                                                                                                                                |
|---|------------------------------------------------------------------------------------------------------------------------------------------------------------------------------------------------------------------------------------------------------------------------------------------------------------------------------------------------------------------------------------------------------------------------------------------------|
| 1 | <p>Q. So what do you know about meningitis?<br/> <i>I know that it can cause fatality, it's very important to be identified quickly, and get the child medical help as, as soon as possible; and you usually associate it with the rash, like you know the clear glass you put on the, on the rash, it doesn't go away.</i><br/> Y004a</p>                                                                                                     |
| 2 | <p><i>How it can come on, it can progress, that, I mean I wouldn't know that, so, and I wouldn't know the symptoms of it either.... or if they did have it, you know, I wouldn't know what would be worrying or what; I mean, you know, kids get fevers and they get, you know, ear infections, chest infections, things like that, but I wouldn't know what would mean it's this, how would you know it's definitely this?</i><br/> Y008a</p> |
| 3 | <p><i>It's gonna need more information, I think, because it's a new vaccine, everyone's gonna be wary of it, it's not an old vaccine that's been around for years already, and I think for a new vaccine they're gonna need to put more information than that on it, personally, because obviously everyone's gonna be wary of it.</i><br/> L007g</p>                                                                                          |
| 4 | <p>Q: So you hadn't heard of it in your role as a GP?<br/> <i>No. No, I hadn't heard of it, and, and it does tend to be at the point of implementation that we, we tend to hear...cos there's so much, so much going on I suppose all the time.</i><br/> Y009a</p>                                                                                                                                                                             |

### Views on the Increased Risk of Fever following Vaccination

#### *Managing Fever*

Most parents expressed worry about fever; particularly its cause and how it might progress for example febrile convulsions (Quote 1, Table 3). They described a variety of strategies to manage fever: removing clothing, applying a damp cloth/putting the child in the bath, checking the child's temperature and administering liquid paracetamol (identified as Calpol®). Whilst many parents discussed using Calpol®, a small number acknowledged that it cannot be used extensively with very young babies (Quote 2, Table 3). Some recognised that their confidence in managing fever had developed as their child got older as they 'could gauge' the child better (Quote 3, Table 3).

#### *Concerns about Fever*

Most parents described becoming concerned about fever based on their child's temperature and if it persists (Quote 4, Table 3). At this point they would seek advice from their GP or Health Visitor,

1 telephone 111, or if very concerned go to Accident and Emergency. First time mothers were more  
2  
3 likely to report seeking help immediately, often from a knowledgeable family member.  
4  
5  
6  
7

### 8 *Fever caused by Vaccination*

9  
10 Some parents said that they would be less worried knowing a fever is caused by vaccination in  
11 that, to some extent, it is expected (Quote 5, Table 3) with a few commenting that fever is  
12 preferable to meningitis (Quote 6, Table 3).  
13  
14  
15  
16  
17

18 Other parents expressed concern that a vaccine would elicit fever. Several of these, most of whom  
19 were first time parents, talked about this being particularly worrying when their child is two months  
20 old, as it is their first appointment for vaccinations, they don't know their baby well yet and cannot  
21 administer much Calpol® to a child so young (Quote 7, Table 3).  
22  
23  
24  
25  
26  
27

### 28 *Would the Fever deter parents from accepting MenB Vaccine?*

29  
30 The overwhelming majority of parents said that despite the link with fever, it would not prevent  
31 them having MenB vaccine. A few explained that this is because they trust that it has been tested  
32 and is safe (Quote 8, Table 3). A minority talked about making specific preparations such as,  
33 considering the timing of the appointment (Quote 9, Table 3) or looking into this vaccination very  
34 carefully to be reassured it is worth having.  
35  
36  
37  
38  
39  
40  
41  
42  
43

44 **Table 3:** Illustrative Quotes – Views on Fever

|                                              |                                                                                                                                                                                                                                                                                                                                                                                                                                                                                                                                                                                                                                                                  |
|----------------------------------------------|------------------------------------------------------------------------------------------------------------------------------------------------------------------------------------------------------------------------------------------------------------------------------------------------------------------------------------------------------------------------------------------------------------------------------------------------------------------------------------------------------------------------------------------------------------------------------------------------------------------------------------------------------------------|
| 45<br>46<br>47<br>48<br>49<br>50<br>51<br>52 | 1<br><i>Yeah, it's, it's scary. Two weeks ago she had a fever, she had it at about, almost 40 her fever was, and it, it is really scary, cos she would literally get really hot to where her face goes red, she's all sweating, then she'll cool down and get really, really hot again, and it's really hard to manage cos you don't know what to do, cos you don't know whether you should be putting cold, cold towel on them like, but you don't wanna shock their body into like all this cold, coldness at once, cos that's where they start, they start fitting. She had a, a small little fit, like a small convulsion, cos she got too hot.</i><br>L007g |
| 53<br>54<br>55<br>56<br>57<br>58<br>59<br>60 | 2<br><i>See that's, the only, the only problem that you have with that is that when they're eight weeks old, no, four weeks old, anything under the, under the age of three months you have to be careful how much Calpol and stuff you can give them, and the only thing you can give them is Calpol. So they are really careful, they, they do tell you to be really careful, but. So if they get a really bad fever, you can only give them one dose of Calpol in a 24 hour period, and that's the 2.5. I mean that should work, but if it didn't you're a bit stuck as a parent as to what you can do to help baby settle down.</i>                          |

|    |   |                                                                                                                                                                                                                                                                                                                                                                                                                                                                                                                                                                                                                                                                                                                         |
|----|---|-------------------------------------------------------------------------------------------------------------------------------------------------------------------------------------------------------------------------------------------------------------------------------------------------------------------------------------------------------------------------------------------------------------------------------------------------------------------------------------------------------------------------------------------------------------------------------------------------------------------------------------------------------------------------------------------------------------------------|
| 1  |   |                                                                                                                                                                                                                                                                                                                                                                                                                                                                                                                                                                                                                                                                                                                         |
| 2  |   | Y006a                                                                                                                                                                                                                                                                                                                                                                                                                                                                                                                                                                                                                                                                                                                   |
| 3  | 3 | <i>I feel that now she's nine months I'm, I'm more confident when she gets sick or has, has had a fever now, I understand her more and I have natural instincts of how to look after her and how bad she is I can gauge, where when she was younger and she did get a fever from some, the, I think it was the two months, the sixteen week one, I'm not sure, that I was so scared when she was, fell ill and, you know, the, the only kind of conversation you get is, if they should get a temperature give them Calpol, but you're just so stressed as it is when they're so young that to have it so, to have it so young is just, to gauge the fever that young is more scary than when they are older, yeah.</i> |
| 4  |   | L008d                                                                                                                                                                                                                                                                                                                                                                                                                                                                                                                                                                                                                                                                                                                   |
| 5  | 4 | <i>It (NHS Choices) tells you if a temperature lasts more than three, seventy two hours that you should be worried. I know from my personal experience when (name of daughter) had a temperature and I have, and it's not been breaking for more than about forty-eight hours, that's when I've started to worry.</i>                                                                                                                                                                                                                                                                                                                                                                                                   |
| 6  |   | L005a                                                                                                                                                                                                                                                                                                                                                                                                                                                                                                                                                                                                                                                                                                                   |
| 7  | 5 | <i>And, and what I find reassuring with the imm, immunisation induced fevers you sort of know what it is, whereas if it's just a random, you know, incident, you'd never, I don't know, I'd be more worried if I, if it was non-immunisation related.</i>                                                                                                                                                                                                                                                                                                                                                                                                                                                               |
| 8  |   | L001a                                                                                                                                                                                                                                                                                                                                                                                                                                                                                                                                                                                                                                                                                                                   |
| 9  | 6 | <i>It's better than meningitis.</i>                                                                                                                                                                                                                                                                                                                                                                                                                                                                                                                                                                                                                                                                                     |
| 10 |   | Y007a                                                                                                                                                                                                                                                                                                                                                                                                                                                                                                                                                                                                                                                                                                                   |
| 11 |   | <i>I'd rather him have a fever...</i>                                                                                                                                                                                                                                                                                                                                                                                                                                                                                                                                                                                                                                                                                   |
| 12 |   | Y007b                                                                                                                                                                                                                                                                                                                                                                                                                                                                                                                                                                                                                                                                                                                   |
| 13 |   | <i>That's what I mean, you can, you can control fever with Calpol and certain things. If they get baby ill from not having the vaccine, it's a lot harder to control than a fever.</i>                                                                                                                                                                                                                                                                                                                                                                                                                                                                                                                                  |
| 14 |   | Y007a                                                                                                                                                                                                                                                                                                                                                                                                                                                                                                                                                                                                                                                                                                                   |
| 15 | 7 | <i>I, I wouldn't be happy with it. Cos at two months you've not given her paracetamol before and you don't know what the side effects are. If she had a fever I would give it to her. But no, I wouldn't like the idea of, personally, at so young.</i>                                                                                                                                                                                                                                                                                                                                                                                                                                                                 |
| 16 |   | L004a                                                                                                                                                                                                                                                                                                                                                                                                                                                                                                                                                                                                                                                                                                                   |
| 17 | 8 | <i>Q. Would you have it for your baby if the MenB vaccine was introduced?</i>                                                                                                                                                                                                                                                                                                                                                                                                                                                                                                                                                                                                                                           |
| 18 |   | <i>I'd be so worried about a brand new vaccine, like our generation being kind of tested on it almost, but I think if it was the fact that everyone did and it's, I probably would, I'd be worried about it though, but I would, if it was, yeah.</i>                                                                                                                                                                                                                                                                                                                                                                                                                                                                   |
| 19 |   | L003c (Black British African Mother, 1 child, fully immunised, group interview)                                                                                                                                                                                                                                                                                                                                                                                                                                                                                                                                                                                                                                         |
| 20 |   | <i>Q. Because it's a new thing?</i>                                                                                                                                                                                                                                                                                                                                                                                                                                                                                                                                                                                                                                                                                     |
| 21 |   | <i>Yeah, it's a new thing and they've been tested, you know, but I think, I think I would.</i>                                                                                                                                                                                                                                                                                                                                                                                                                                                                                                                                                                                                                          |
| 22 |   | L003c                                                                                                                                                                                                                                                                                                                                                                                                                                                                                                                                                                                                                                                                                                                   |
| 23 |   | <i>Yeah, again I probably would, I mean it, I would probably, the increased risk of fever would be worrying, but I think if there's anything that they can be protected against, I tend to just go along with what the government are recommending, and if they, if they say it's safe and I tend to just believe that that's, that's true (laughs) trust that it's true, and, and go with it, and I think I'd rather have them immunised against something and have a little bit of a fever for a day than not, and just them, them catching something awful. (laughs)</i>                                                                                                                                             |
| 24 |   | L003g (White British Mother, 1 child, fully immunised, group interview)                                                                                                                                                                                                                                                                                                                                                                                                                                                                                                                                                                                                                                                 |
| 25 |   | <i>I'd still have to be so convinced that it was worth it for, to have fever and for them to be having extra stuff in their bodies....I'd need to be really convinced it was worthwhile.</i>                                                                                                                                                                                                                                                                                                                                                                                                                                                                                                                            |
| 26 |   | Y003a                                                                                                                                                                                                                                                                                                                                                                                                                                                                                                                                                                                                                                                                                                                   |
| 27 | 9 | <i>Q. Does that (the fever) change how you feel about taking him?</i>                                                                                                                                                                                                                                                                                                                                                                                                                                                                                                                                                                                                                                                   |
| 28 |   | <i>It doesn't, for me not necessarily, no, cos I suppose at least if you know it's gonna happen</i>                                                                                                                                                                                                                                                                                                                                                                                                                                                                                                                                                                                                                     |
| 29 |   |                                                                                                                                                                                                                                                                                                                                                                                                                                                                                                                                                                                                                                                                                                                         |
| 30 |   |                                                                                                                                                                                                                                                                                                                                                                                                                                                                                                                                                                                                                                                                                                                         |
| 31 |   |                                                                                                                                                                                                                                                                                                                                                                                                                                                                                                                                                                                                                                                                                                                         |
| 32 |   |                                                                                                                                                                                                                                                                                                                                                                                                                                                                                                                                                                                                                                                                                                                         |
| 33 |   |                                                                                                                                                                                                                                                                                                                                                                                                                                                                                                                                                                                                                                                                                                                         |
| 34 |   |                                                                                                                                                                                                                                                                                                                                                                                                                                                                                                                                                                                                                                                                                                                         |
| 35 |   |                                                                                                                                                                                                                                                                                                                                                                                                                                                                                                                                                                                                                                                                                                                         |
| 36 |   |                                                                                                                                                                                                                                                                                                                                                                                                                                                                                                                                                                                                                                                                                                                         |
| 37 |   |                                                                                                                                                                                                                                                                                                                                                                                                                                                                                                                                                                                                                                                                                                                         |
| 38 |   |                                                                                                                                                                                                                                                                                                                                                                                                                                                                                                                                                                                                                                                                                                                         |
| 39 |   |                                                                                                                                                                                                                                                                                                                                                                                                                                                                                                                                                                                                                                                                                                                         |
| 40 |   |                                                                                                                                                                                                                                                                                                                                                                                                                                                                                                                                                                                                                                                                                                                         |
| 41 |   |                                                                                                                                                                                                                                                                                                                                                                                                                                                                                                                                                                                                                                                                                                                         |
| 42 |   |                                                                                                                                                                                                                                                                                                                                                                                                                                                                                                                                                                                                                                                                                                                         |
| 43 |   |                                                                                                                                                                                                                                                                                                                                                                                                                                                                                                                                                                                                                                                                                                                         |
| 44 |   |                                                                                                                                                                                                                                                                                                                                                                                                                                                                                                                                                                                                                                                                                                                         |
| 45 |   |                                                                                                                                                                                                                                                                                                                                                                                                                                                                                                                                                                                                                                                                                                                         |
| 46 |   |                                                                                                                                                                                                                                                                                                                                                                                                                                                                                                                                                                                                                                                                                                                         |
| 47 |   |                                                                                                                                                                                                                                                                                                                                                                                                                                                                                                                                                                                                                                                                                                                         |
| 48 |   |                                                                                                                                                                                                                                                                                                                                                                                                                                                                                                                                                                                                                                                                                                                         |
| 49 |   |                                                                                                                                                                                                                                                                                                                                                                                                                                                                                                                                                                                                                                                                                                                         |
| 50 |   |                                                                                                                                                                                                                                                                                                                                                                                                                                                                                                                                                                                                                                                                                                                         |
| 51 |   |                                                                                                                                                                                                                                                                                                                                                                                                                                                                                                                                                                                                                                                                                                                         |
| 52 |   |                                                                                                                                                                                                                                                                                                                                                                                                                                                                                                                                                                                                                                                                                                                         |
| 53 |   |                                                                                                                                                                                                                                                                                                                                                                                                                                                                                                                                                                                                                                                                                                                         |
| 54 |   |                                                                                                                                                                                                                                                                                                                                                                                                                                                                                                                                                                                                                                                                                                                         |
| 55 |   |                                                                                                                                                                                                                                                                                                                                                                                                                                                                                                                                                                                                                                                                                                                         |
| 56 |   |                                                                                                                                                                                                                                                                                                                                                                                                                                                                                                                                                                                                                                                                                                                         |
| 57 |   |                                                                                                                                                                                                                                                                                                                                                                                                                                                                                                                                                                                                                                                                                                                         |
| 58 |   |                                                                                                                                                                                                                                                                                                                                                                                                                                                                                                                                                                                                                                                                                                                         |
| 59 |   |                                                                                                                                                                                                                                                                                                                                                                                                                                                                                                                                                                                                                                                                                                                         |
| 60 |   |                                                                                                                                                                                                                                                                                                                                                                                                                                                                                                                                                                                                                                                                                                                         |

|                                                                                                                                                                                        |
|----------------------------------------------------------------------------------------------------------------------------------------------------------------------------------------|
| <p>you can be equipped with the tools to deal with it, and you can be practical in terms of when you go and have that done and being ready for it and working around it.<br/>Y005a</p> |
|----------------------------------------------------------------------------------------------------------------------------------------------------------------------------------------|

## Acceptability of Administering Paracetamol Post-vaccination

### *Routine Administration of Paracetamol*

Most parents said that they have Calpol® at home and routinely use it, although not when a child is only two months old (Quote 1, Table 4). A small minority of parents described having difficulties giving their child Calpol® as he/she spits it out. Two parents appeared to not know that Calpol is liquid infant paracetamol. A few parents (one GP) pointed out that the regular instructions for administering Calpol® to a two month old baby are different to the advice for use of paracetamol post MenB vaccination; and that this inconsistency might worry and confuse parents (Quote 2, Table 4). Two parents did not agree with giving their child paracetamol because of concerns about its side effects and the view that it is used far more routinely in the UK compared to their home country (Quote 3, Table 4).

### *Administration of Paracetamol as a Preventive Measure*

Views on parents' willingness to administer prophylactic paracetamol after MenB vaccination differed. Many parents would be willing to administer paracetamol on the assumption that this is best for their child, even if they were worried about doing so (Quote 4, Table 4). However, questions were raised about whether they should wake a sleeping baby to administer a dose, or whether the third dose could be given the following morning, and what should they do if they forgot to give the paracetamol or if the paracetamol does not work (Quote 5, Table 4).

However a few parents expressed worries about administering prophylactic paracetamol. Reasons for this were a preference not to give paracetamol to their child generally, that their child struggles to take paracetamol (they spit it out), a worry about putting something else into the child's body after vaccination and that paracetamol might mask vaccine side effects. Several of these parents explicitly stated that they would not give their child the paracetamol after MenB vaccination unless the child develops a fever (Quote 6, Table 4).

**Table 4:** Illustrative quotes - Acceptability of Administering Paracetamol Post-vaccination

|   |                                                                                                                                                                                                                                                                                                                                                                                                                                                                                                                                       |
|---|---------------------------------------------------------------------------------------------------------------------------------------------------------------------------------------------------------------------------------------------------------------------------------------------------------------------------------------------------------------------------------------------------------------------------------------------------------------------------------------------------------------------------------------|
| 1 | <p>Q. <i>Has everybody got paracetamol at home?</i></p> <p><i>About two months I didn't, but now he's getting a bit older I have got some in, in, just in case, cos of teething and vaccinations and everything else. But at, at, at two months probably not.</i></p> <p>L007e</p>                                                                                                                                                                                                                                                    |
| 2 | <p><i>People will worry about, cos it says, the, the advice on the bottle is from three months and then there's just like a one-off post-immunisation dose in younger ones. So you'd have to be quite clear that it was safe; I think parents will worry about the safety of giving more than, more paracetamol than is prescribed on the bottle you're buying.</i></p> <p>Y009a</p>                                                                                                                                                  |
| 3 | <p><i>I have allergic just when you're saying paracetamol. I'm not agreeing with paracetamol. I know a whole country they been treating with paracetamol but I don't accept this.</i></p> <p>Q: <i>But in terms of fever and how to deal with it?</i></p> <p><i>It, but you under, just look, they treat you with everything, all sickness they give you paracetamol, it's can't be, can't be helpful this stuff. But if you understand me, I don't, I'm not gonna use paracetamol.</i></p> <p>L002a</p>                              |
| 4 | <p><i>I suppose if I knew it was gonna stop him being unwell I'd do it. So I suppose if they're saying there's a higher risk that he's gonna be unwell straight after it, give him Calpol to try and make him comfortable I wouldn't have a concern with that. But yeah, I mean I don't think as a mum you'd want your child to be in any pain so if someone tells you take this and it's not gonna hurt you'd do it wouldn't you?</i></p> <p>Y005a</p>                                                                               |
| 5 | <p><i>What if the paracetamol actually doesn't lower the fever then at what point do I say, you know, cos if I go to the doctors and say, oh, you know, he's had the vaccinations but he's got a fever, and they tend to say, oh yeah, it's absolutely fine, it's due to the vaccinations, but then at what point do I say, OK, well he has had the vaccinations but the fever's carried on going up, paracetamol's not working, given him Ibuprofen, what now?</i></p> <p>L008c</p>                                                  |
| 6 | <p><i>I think if it was me as well I would have issues about the appropriateness of just giving (name of daughter) paracetamol for the sake of giving her paracetamol when she's not got a temperature. So I could understand, I think I would feel happier giving her a dose of paracetamol for, for a temperature rather than a dose of paracetamol just for the sake of having paracetamol. I don't think I would probably give (name of daughter) the paracetamol, if she was asleep I wouldn't wake her up.</i></p> <p>L005a</p> |

#### Acceptability of four injections at the 12-Month Booster Visit

Most parents were accepting of the vaccination schedule, trusting that it is informed by sound research and therefore safe (Quote 1, Table 5). A small number mentioned that the schedule is complex and busy which can be particularly hard to 'keep a handle on' with a new baby. Views on the acceptability of four injections at the 12-month appointment differed.



1  
2  
3  
4  
5  
6  
7  
8  
9  
10  
11  
12  
13  
14  
15  
16  
17  
18  
19  
20  
21  
22  
23  
24  
25  
26  
27  
28  
29  
30  
31  
32  
33  
34  
35  
36  
37  
38  
39  
40  
41  
42  
43  
44  
45  
46  
47  
48  
49  
50  
51  
52  
53  
54  
55  
56  
57  
58  
59  
60

Some parents (often with more than one child) preferred all four injections in one visit. This view was based on practical reasons such as the inconvenience of booking and finding time to attend multiple appointments, particularly for those mothers who have returned to work by 12 months (Quote 2, Table 5). They acknowledged that there would be an increased likelihood of them missing appointments if they are on different days. These parents also talked about preferring to 'get it all over with in one go' in terms of reducing distress to the child at the appointment and afterwards (Quote 3, Table 5). A few of these parents spoke about their child being more 'robust' by 12 months and so they felt more comfortable in taking them for multiple injections at that age.

Just over half of parents expressed a preference to separate the vaccines over different visits with most preferring two injections at two visits a month apart, although two parents wanted even more visits with fewer injections at each. These preferences were predominantly to avoid fever (if that is associated with the MenB vaccine at this age) and distress to the baby on the day (Quote 4, Table 5). A small number of parents talked about preferring to avoid overloading their child's immune system with multiple vaccines. These issues were more important for these parents than the potential inconvenience of multiple appointments.

A few parents suggested that they should be given a choice about the 12-month booster visit as they know what works best for their child. Similar numbers of parents disagreed, preferring to be offered the safest approach as well as acknowledging the difficulty of implementing a choice system.

**Table 5:** Illustrative quotes – Acceptability of four vaccines at 12-month booster visit

|   |                                                                                                                                                                                                                                                                                                                                                                                           |
|---|-------------------------------------------------------------------------------------------------------------------------------------------------------------------------------------------------------------------------------------------------------------------------------------------------------------------------------------------------------------------------------------------|
| 1 | <i>I just put my trust in the fact that it's the best thing for her and I'm sure the healthcare professionals know what they are doing and so I don't think about it too much.</i><br>L004b                                                                                                                                                                                               |
| 2 | <i>I just, with having two really young children, the logistics of getting a doctor's appointment, getting there, and if, it sounds odd but if they're gonna be ill anyway, and as long as the fever's not more dangerous, I'm not too, I, I don't feel strongly.</i><br>L001a                                                                                                            |
| 3 | <i>I know it's not nice when they're having it done, but it only lasts for a few minutes, and I think for the sake of having the whole build up of going back again for another set and will they get another fever again and will it happen again, I think sometimes it's just... Best to get it all out of the way, let them have their five minutes' cry and forget it. (laughter)</i> |

|   |                                                                                                                                                                                                                                                                                                     |
|---|-----------------------------------------------------------------------------------------------------------------------------------------------------------------------------------------------------------------------------------------------------------------------------------------------------|
|   | L003c                                                                                                                                                                                                                                                                                               |
| 4 | <i>I'll prefer to split because her immune system, you know, can be built and have a chance; if you give too much, you never know what could happen. OK, it's in one sense that's like, you know, we have to come back a few times, but on the other hand it's my baby, you know, health, so...</i> |
|   | L003a                                                                                                                                                                                                                                                                                               |

## Information Needs

### *Information about MenB Disease*

Parents wanted to understand why MenB disease is something they need to vaccinate their child against. To achieve this, they wanted to know how to recognise it, what are the signs and symptoms (identified as the most important information; Quote 1, Table 6), how many people catch it, who is most at risk, how it spreads and how it is different to other strains of meningococcal disease

### *Information about MenB Vaccine*

Parents identified the most important information to be about the vaccine's short and long term side effects, likely occurrence and how to respond to them (Quote 1, Table 6). They also wanted information to compare the benefits versus the risks of the vaccine, present how it has been tested and if it has been used elsewhere. Other details of the vaccine required include the reason it is needed in addition to MenC vaccine, that it does not protect against all meningococcal disease and how it is administered (number and timing of doses, injection/oral/nasal spray). They also wanted to understand why it causes fever, the likelihood of fever if administered alongside other vaccines and what would prevent their child having the injection on the day.

### *Information about Fever and Paracetamol*

Parents identified the most important information about fever and paracetamol to be about how to administer paracetamol following MenB vaccination (dose, frequency, what happens if it does not work (Quote 2, Table 6) as well as alternatives to giving paracetamol, whether they should wake a sleeping baby to administer the paracetamol as well as what level and length of fever is normal, when should they be concerned and where should they go to seek help.



### Timing of Information

Most parents preferred to have information about MenB vaccine and the associated fever before they attend the appointment (Quote 3, Table 6). Suggested methods of doing this were: sending the leaflet out with the invitation letter, giving it to the parent when they book the appointment at the GP practice or the practice nurse/health visitor providing it in routine appointments a few weeks before. A few parents said that whilst they would prefer to receive the Men B vaccine leaflet in advance, they would want the paracetamol leaflet at the appointment as that is the time they will focus on the specifics of timing and dosage (Quote 4, Table 6). Two parents talked about preferring to have information about all vaccinations before the baby is born as they had time and 'headspace' then to read it (Quote 5, Table 6).

**Table 6:** Illustrative quotes – Information needs

|   |                                                                                                                                                                                                                                                                                                                                                                                                                                                                                                                            |
|---|----------------------------------------------------------------------------------------------------------------------------------------------------------------------------------------------------------------------------------------------------------------------------------------------------------------------------------------------------------------------------------------------------------------------------------------------------------------------------------------------------------------------------|
| 1 | <p><i>Well I like, obviously that, you know, this would make me, the statistics would make me think oh right, I need to get that done, the fear of the disease, you know, knowing what it is and what it can do would make, help me make the decision as well. And then, but then this one has all about the signs and symptoms and things like that, which, I mean you would want to know especially after the injection, more information about how to deal with the effects of the illness itself.</i></p> <p>Y008a</p> |
| 2 | <p><i>Q. What's the most important issue for you to know about the paracetamol and fever? What's the key thing the leaflet needs to include?</i></p> <p><i>How much.</i><br/>Y007e<br/><i>How often.</i><br/>Y007b</p> <p><i>...like a big space in sort of like, cos it only says here, I mean a lot of people might skim over that or misread it, for the dose</i><br/>Y007d</p> <p><i>Q. So the dose is the key thing you want guidance on?</i></p> <p><i>Yeah.</i><br/>Y007d</p>                                       |
| 3 | <p><i>Q. When would you want to get this leaflet, when would it be most useful?</i></p> <p><i>I guess maybe with the letter that you get to take, you know. Yeah, cos I wouldn't want it to arrive for the vaccination and be like, right, here's a leaflet do you want it now? I'd be like oh my gosh, I don't know, but maybe with a letter when you're due for your vaccination saying, you know, this is the new one, would you be happy to have it? At least then I can book then...</i><br/>Y008a</p>                |
| 4 | <p><i>I would want this on the day at the time as you would if you were going for anything to your doctors, so that you can use it as a, a refer to for whatever treatment you've then got to</i></p>                                                                                                                                                                                                                                                                                                                      |

|   |                                                                                                                                                                                                                                                                                                                                                                                                                                                                                                                                                                                   |
|---|-----------------------------------------------------------------------------------------------------------------------------------------------------------------------------------------------------------------------------------------------------------------------------------------------------------------------------------------------------------------------------------------------------------------------------------------------------------------------------------------------------------------------------------------------------------------------------------|
|   | <i>follow when you get home.</i><br>Y005a                                                                                                                                                                                                                                                                                                                                                                                                                                                                                                                                         |
| 5 | <i>Um (pause) probably before they have the baby, I think, because when you've just had a baby and you're all over the place and your life is completely turned upside down and then you have to take your sleep deprived self and the baby at eight weeks to have their first vaccination, I think, you know, even if people don't read it, when they go to antenatal classes or the midwife gives them it, I think you're more likely when you're pregnant to have the time to do it, especially when it's your first baby, when you're more focused on just that.</i><br>L001a |

## DISCUSSION

This study explored parents' knowledge of and attitudes to MenB disease and of MenB vaccine, and parents' information needs to inform (a) the introduction of the MenB vaccine into the childhood schedule and (b) the information materials developed by PHE. To our knowledge this is the only *current* UK study providing detailed, up-to-date information for PHE and primary care health professionals to facilitate the successful implementation of MenB vaccine. We aimed to capture the views of parents across the two broad categories of parental factors that influence uptake of childhood vaccination (socio-economic disadvantage, concerned about safety or necessity of vaccines)[13-18]. Although the proportion of parents in this study with a university degree (55%) was higher than the proportion reported nationally for a comparable age group (about 40%),[21] diversity was achieved in other factors which are associated with uptake of childhood vaccination namely ethnicity, parental age and number of children. We recruited in settings outside the NHS increasing the likelihood of speaking to parents with a range of views. We have no reason to believe that the parents in this study from Yorkshire and London are markedly different to other parents in the UK either in their acceptance of immunisation or their social contexts which impact on their access to immunisation services. With the exception of one mother, the parents self-reported to be full or partial immunisers, reflecting the parents most likely to attend for MenB vaccination. We investigated similarities and differences in views across parents of different education, ethnicity and number of children; and only identified a small number of differing views according to the number of children a parent had. As with all interview studies, there may have been some "social desirability" in participants' accounts and responses could have been influenced by others in the group interviews. These group interviews were usually with mothers attending the same mother and baby group, or groups of friends and couples. They were typically

1  
2 lively discussions and we observed many frank exchanges of opinion with conflicting views  
3  
4 emerging on several issues. This is reassuring. Moreover, the parents interviewed all had very  
5  
6 young children, they had recent experience of the immunisation process and of making  
7  
8 immunisation decisions. However, at the time of the study the introduction of MenB vaccine had  
9  
10 not yet been announced and so parents' views about the vaccine, in particular whether it would be  
11  
12 acceptable were hypothetical.

13  
14  
15  
16 Although most of the parents surveyed were not familiar with the term meningococcal disease,  
17  
18 they recognised meningitis and septicaemia to be serious, life threatening conditions. In their  
19  
20 consideration of MenB it was clear that for these parents, trusting the NHS and by definition health  
21  
22 professionals, is a key influence on their acceptance of vaccines, a finding that has been reported  
23  
24 elsewhere repeatedly.[22,23] This was evident in the view expressed by many parents that they  
25  
26 will accept new vaccines or changes to the schedule because they trust the NHS to make  
27  
28 evidence-based decisions and in particular that vaccines have been appropriately tried and tested.  
29  
30 This also appeared to be the case for fever, if pre-warned that this is a likely consequence of MenB  
31  
32 vaccine, most would not be deterred from accepting the vaccine. Advising parents of the likely  
33  
34 adverse events following a vaccine is an important part of the immunisation process. Vaccine  
35  
36 safety is a top priority for parents and if prepared for side effects with advice on their management,  
37  
38 they are likely to be less concerned. This was borne out in one trial of MenB vaccine which  
39  
40 included cohorts of parents who either knew or did not know which vaccines their child was  
41  
42 receiving. Medical attention rates for fever were lower among parents who knew their child was  
43  
44 receiving MenB vaccine, underlining the importance of advising parents about the possibility of  
45  
46 fever following this vaccine.[24]

47  
48  
49  
50 Based on parental reports of their experiences of the immunisation process, we identified elements  
51  
52 where improvements are required. For example, some mothers reported feeling pressurised into  
53  
54 accepting vaccines and first time mothers in particular found the process stressful. Health  
55  
56 professionals may need reminding that the nature of their interactions is a key factor in influencing  
57  
58 a parent's attitudes to immunisation[25] this includes not assuming that attendance for  
59  
60

1 immunisation indicates parents have no questions or concerns. Making this assumption or lacking  
2 empathy about parents' distress over the pain their child is experiencing may lead to future  
3 defaulting.[26] This is particularly important with the introduction of MenB vaccine, when infants will  
4 be given three injections at their first immunisation visit at eight weeks of age.  
5  
6  
7  
8  
9

10  
11 In contrast, it has also been reported that health professionals may over-estimate parents'  
12 concerns about their child receiving multiple injections.[9] Although some parents in our study  
13 expressed concern about the pain and distress and possible impact on their child's immune system  
14 of having an additional injection, most felt this was outweighed by the value of protection against  
15 such a serious infection. MenB's introduction will have led to some initial queries or concerns from  
16 both health professionals and parents about the need for an additional injection, but experience  
17 from the introduction of other vaccines suggests that it quickly becomes acceptable practice[9]  
18 underlining again the importance of a positive recommendation from a confident, well informed  
19 health professional in securing parental acceptance of vaccines.[9]  
20  
21  
22  
23  
24  
25  
26  
27  
28  
29  
30  
31

32 MenB vaccine is another significant milestone in the prevention of bacterial meningitis and  
33 septicaemia. Our findings mirror those from other studies conducted in other high income countries  
34 in Europe[27-29] and Australia[30] although there were considerable differences in the populations  
35 sampled in terms of age and sampling methods. Only one other study explicitly explored the  
36 hypothetical impact on vaccine acceptance of an increased risk of mild to moderate fever  
37 associated with the vaccine and reported that it reduced intent to immunise for only a small  
38 proportion.[30] The recommendation to give prophylactic paracetamol after the MenB doses at two  
39 and four months represents a change in advice with potential for confusion. Most parents in our  
40 study reported that despite some concerns, if advised to do so they would be likely to administer  
41 paracetamol. However, some may be reluctant and health professionals need to be equipped to  
42 discuss this issue with parents. It will be important to monitor the side effects of MenB vaccine on a  
43 population level and whether increased rates of fever affect uptake of the vaccine or attendance  
44 rates in primary care and Accident and Emergency.  
45  
46  
47  
48  
49  
50  
51  
52  
53  
54  
55  
56  
57  
58  
59  
60

1  
2  
3  
4  
5  
6  
7  
8  
9  
10  
11  
12  
13  
14  
15  
16  
17  
18  
19  
20  
21  
22  
23  
24  
25  
26  
27  
28  
29  
30  
31  
32  
33  
34  
35  
36  
37  
38  
39  
40  
41  
42  
43  
44  
45  
46  
47  
48  
49  
50  
51  
52  
53  
54  
55  
56  
57  
58  
59  
60

The successful implementation of the MenB vaccination programme requires increased awareness among parents of the infection, the safety and effectiveness of the vaccine, the likelihood of fever and its management if given concomitantly with other vaccines and the safety of giving multiple vaccines. Although we did not identify any new issues for parents in this study regarding vaccines, it was still important to explore their views and to consider their information needs. PHE developed written information for parents, which was informed by our findings.[31-33] Resources to support the introduction of the vaccine were also developed for health professionals.[34] In view of the successful implementation of other vaccines to prevent meningitis and septicaemia (Hib, MenC, PCV)[35] and on the basis that parents' perceptions of the severity of a disease is an important determinant of vaccine uptake,[19] the prospects for the successful introduction of MenB vaccine seem good. MenB vaccine was introduced into the routine vaccine schedule in the UK in September 2015 with three doses given at 2, 4 and 12 months concomitantly with other vaccines.[36] Preliminary vaccine coverage data suggests this has successfully been integrated into the national programme with uptakes of 94.3% for one dose and 91.5% for two doses at 12 months of age.[37] Our findings may be useful for other high income countries when considering the implementation of a MenB vaccine programme in highlighting potential issues that need addressing. However, in view of differences between population groups in terms of attitudes to and acceptability of specific vaccines, it would be important to explore whether other issues may apply that could influence vaccine acceptance.

### **Acknowledgments**

Our thanks go to the Children's Centres, mother and toddler groups and the midwife who facilitated recruitment to the study. We are also grateful to the parents who gave up their time to participate.

### **Footnotes**

#### **Contributors**

JY and VS conceived the study. All authors were responsible for the development and refinement of the study methods. CJ and HB conducted all data collection and data analysis. CJ and HB

1 drafted the manuscript. All authors contributed to the revisions and approved the final manuscript.

2  
3 All authors agree to be accountable for all aspects of the work.  
4  
5  
6

#### 7 Funding

8  
9 This work was supported by PHE. The study funders were involved in the study conception,  
10 design, interpretation of data, writing of the article and decision to submit the article for publication.  
11  
12 They did not contribute to data collection or data analysis. The research team operated completely  
13  
14 independently of the funders in data collection and data analysis.  
15  
16  
17  
18

#### 19 Competing Interests

20  
21 None  
22  
23  
24  
25

#### 26 Data sharing

27  
28 There are no unpublished data available.  
29  
30  
31  
32  
33  
34  
35  
36  
37  
38  
39  
40  
41  
42  
43  
44  
45  
46  
47  
48  
49  
50  
51  
52  
53  
54  
55  
56  
57  
58  
59  
60

## References

- [1] Borrow R, Abad R, Trotter C, van der Klis FR, Vazquez JA. Effectiveness of meningococcal serogroup C vaccine programmes. *Vaccine* 2013;31:4477-86.
- [2] Ladhani SN, Flood JS, Ramsay ME, Campbell H, Gray SJ, Kaczmarski EB et al. Invasive meningococcal disease in England and Wales: implications for the introduction of new vaccines. *Vaccine* 2012;30:3710-6.
- [3] NHS England, Public Health England. Introduction of MenB Immunisation for infants. London: NHS England; 2015.  
[https://www.gov.uk/government/uploads/system/uploads/attachment\\_data/file/437906/150622\\_Me nB\\_bipartite\\_letter.pdf](https://www.gov.uk/government/uploads/system/uploads/attachment_data/file/437906/150622_Me nB_bipartite_letter.pdf) (accessed 06/05/16)
- [4] Bedford H, Lansley M. More vaccines for children? Parents' views. *Vaccine* 2007;25:7818-23.
- [5] Peckham C, Bedford H, Senturia Y, Ades A. National immunisation study: Factors influencing immunisation uptake in childhood. Horsham: Action Research for the Crippled Children; 1989.
- [6] de Wals P. Results of a mass immunisation campaign with 4-components serogroup b meningococcal vaccine (4CMenB) in Quebec, Canada .Oral Presentations at Meningitis Research Foundation Conference, London; 2015. <http://www.meningitis.org/conference2015#Wals> (accessed 06/05/16)
- [7] Gossger N, Snape MD, Yu L-M, Finn A, Bona G, Esposito S et al. Immunogenicity and tolerability of recombinant serogroup B meningococcal vaccine administered with or without routine infant vaccinations according to different immunization schedules: a randomized controlled trial. *JAMA* 2012;307:573-82.
- [8] World Health Organisation. Multiple Injections: Protecting Infants as Soon as Possible. Multiple Injections: Acceptability and Safety. Geneva: World Health Organisation; 2014.  
[http://www.who.int/immunization/diseases/poliomyelitis/inactivated\\_polio\\_vaccine/multiple\\_injections\\_acceptability\\_safety.pdf](http://www.who.int/immunization/diseases/poliomyelitis/inactivated_polio_vaccine/multiple_injections_acceptability_safety.pdf) (accessed 06/05/16)
- [9] Wallace AS, Mantel C, Mayers G, Mansoor, O, Gindler, JS, Hyde, TB. Experiences with provider and parental attitudes and practices regarding the administration of multiple injections during infant vaccination visits: lessons for vaccine introduction. *Vaccine* 2014;32:5301-10.



- 1  
2 [10] Smith PJ, Humiston SG, Marcuse EK, Zhao Z, Dorell CG, Howes C et al. Parental delay or  
3 refusal of vaccine doses, childhood vaccination coverage at 24 months of age, and the Health  
4 Belief Model. *Public Health Rep* 2011;126(Suppl 2):135.  
5  
6  
7 [11] Public Health England. Immunisation against Infectious Diseases. Chapter 8: Vaccine safety  
8 and the management of adverse events following immunisation (Page 56). London: Public Health  
9 England; 2014.  
10  
11 [https://www.gov.uk/government/uploads/system/uploads/attachment\\_data/file/147868/Green-](https://www.gov.uk/government/uploads/system/uploads/attachment_data/file/147868/Green-Book-Chapter-8-v4_0.pdf)  
12 [Book-Chapter-8-v4\\_0.pdf](https://www.gov.uk/government/uploads/system/uploads/attachment_data/file/147868/Green-Book-Chapter-8-v4_0.pdf) (accessed 06/05/16)  
13  
14  
15 [12] Purssell E. Parental fever phobia and its evolutionary correlates. *J Clin Nurs* 2009;18:210-8.  
16  
17 [13] Kai J. What worries parents when their preschool children are acutely ill, and why: a qualitative  
18 study. *BMJ* 1996;313:983-6.  
19  
20 [14] Falagas ME, Zarkadoulia E. Factors associated with suboptimal compliance to vaccinations in  
21 children in developed countries: a systematic review. *Curr Med Res Opin* 2008;24:1719-41.  
22  
23 [15] Brown KF, Kroll JS, Hudson MJ, Ramsay M, Green J, Long SJ et al. Factors underlying  
24 parental decisions about combination childhood vaccinations including MMR: a systematic review.  
25 *Vaccine* 2010;28:4235-48.  
26  
27 [16] Tickner S, Leman PJ, Woodcock A. Factors underlying suboptimal childhood immunisation.  
28 *Vaccine* 2006;24:7030-6.  
29  
30 [17] Samad L, Tate AR, Dezateux C, Peckham C, Butler N, Bedford H. Differences in risk factors  
31 for partial and no immunisation in the first year of life: prospective cohort study. *BMJ*  
32 2006;332:1312-3.  
33  
34 [18] Mills E, Jadad AR, Ross C, Wilson K. Systematic review of qualitative studies exploring  
35 parental beliefs and attitudes toward childhood vaccination identifies common barriers to  
36 vaccination. *J Clin Epidemiol* 2005;58:1081-8.  
37  
38 [19] Larson HJ, Jarrett C, Eckersberger E, Smith DM, Paterson P. Understanding vaccine  
39 hesitancy around vaccines and vaccination from a global perspective: A systematic review of  
40 published literature, 2007–2012. *Vaccine* 2014;32:2150-9.  
41  
42 [20] Braun V, Clarke V. Using thematic analysis in psychology. *Qual Res Psycho* 2006;3:77-101.  
43  
44  
45  
46  
47  
48  
49  
50  
51  
52  
53  
54  
55  
56  
57  
58  
59  
60



1 [21] Office for National Statistics. 2011 Census Analysis, Local Area Analysis of Qualifications  
2 Across England and Wales 2014. London: ONS. [http://www.ons.gov.uk/ons/rel/census/2011-  
4 census-analysis/local-area-analysis-of-qualifications-across-england-and-wales/index.html](http://www.ons.gov.uk/ons/rel/census/2011-<br/>3 census-analysis/local-area-analysis-of-qualifications-across-england-and-wales/index.html)  
5  
6

7 (accessed 06/05/16)  
8

9 [22] Benin AL, Wisler-Scher DJ, Colson E, Shapiro ED, Holmboe ES. Qualitative analysis of  
10 mothers' decision-making about vaccines for infants: the importance of trust. *Pediatrics*  
11 2006;117:1532-41.  
12  
13

14 [23] Larson HJ, Cooper LZ, Eskola J, Katz SL, Ratzan S. Addressing the vaccine confidence gap.  
15 *Lancet* 2011;378:526-35.  
16  
17

18 [24] Vesikari T, Esposito S, Prymula R, Ypma E, Kohl I, Toneatto D et al. Immunogenicity and  
19 safety of an investigational multicomponent, recombinant, meningococcal serogroup B vaccine  
20 (4CMenB) administered concomitantly with routine infant and child vaccinations: results of two  
21 randomised trials. *Lancet* 2013;381:825-35.  
22  
23

24 [25] Leask J, Kinnersley P, Jackson C, Cheater F, Bedford H, Rowles G. Communicating with  
25 parents about vaccination: a framework for health professionals. *BMC Pediatr* 2012;12:154.  
26  
27

28 [26] Harrington PM, Woodman C, Shannon WF. Low immunisation uptake: Is the process the  
29 problem? *J Epidemiol Community Health* 2000;54:394-400.  
30  
31

32 [27] Le Ngoc Tho S, Ader F, Ferry T, Floret D, Arnal M et al. Vaccination against serogroup B  
33 *Neisseria meningitidis*: Perceptions and attitudes of parents. *Vaccine* 2015;33:3463-70.  
34  
35

36 [28] Bakhache P, Rodrigo C, Davie S, Ahuja A, Sudovar B, Crudup T et al. Health care providers'  
37 and parents' attitudes toward administration of new infant vaccines—a multinational survey. *Euro J*  
38 *Pediatr* 2013;172:485-92.  
39  
40

41 [29] Mameli C, Faccini M, Mazzali C, Picca M, Colella G, Duca PG et al. Acceptability of  
42 meningococcal serogroup B vaccine among parents and health care workers in Italy: A survey.  
43 *Hum Vaccin Immunother* 2014;10:3004-10.  
44  
45

46 [30] Marshall H, Clarke M, Sullivan T. Parental and community acceptance of the benefits and risks  
47 associated with meningococcal B vaccines. *Vaccine* 2014;32:338-44.  
48  
49

50 [31] Public Health England. A 3 Minute Guide: Protecting your baby against meningitis and  
51 septicaemia. Secondary A 3 Minute Guide: Protecting your baby against meningitis and  
52  
53  
54  
55  
56  
57  
58  
59  
60

1 septicaemia. London: Public Health England; 2015.

2  
3 [https://www.gov.uk/government/uploads/system/uploads/attachment\\_data/file/448028/9183\\_MenB](https://www.gov.uk/government/uploads/system/uploads/attachment_data/file/448028/9183_MenB)  
4 [-DL\\_3\\_Min\\_guide\\_17\\_web.pdf](#). (accessed 06/05/16)

5  
6  
7  
8 [32] Public Health England. Protecting your baby against meningitis and septicaemia caused by  
9 meningococcal B bacteria. London: Public Health England; 2015.

10  
11 [https://www.gov.uk/government/uploads/system/uploads/attachment\\_data/file/448054/9133\\_menB](https://www.gov.uk/government/uploads/system/uploads/attachment_data/file/448054/9133_menB)  
12 [\\_A5\\_Leaflet\\_17\\_web.pdf](#) (accessed 06/05/16)

13  
14  
15  
16 [33] Public Health England. Using Paracetamol to prevent and treat fever after MenB vaccination.  
17 London: Public Health England; 2015.

18  
19 [https://www.gov.uk/government/uploads/system/uploads/attachment\\_data/file/450890/9413-](https://www.gov.uk/government/uploads/system/uploads/attachment_data/file/450890/9413-)  
20 [paracetamol-menB-2page-A4-05-web.pdf](#) (accessed 06/05/16)

21  
22  
23  
24 [34] Public Health England. Meningococcal B (MenB) vaccination programme. London: Public  
25 Health England; 2015. <https://www.gov.uk/government/collections/meningococcal-b-menb->  
26 [vaccination-programme](#). (accessed 06/05/16)

27  
28  
29  
30 [35] Public Health England. Health Protection Report. 10 (44), 16 December 2016.

31  
32 Quarterly vaccination coverage statistics for children aged up to five years in the UK (COVER  
33 programme): July to September 2016. London: Public Health England; 2016.

34  
35 [https://www.gov.uk/government/uploads/system/uploads/attachment\\_data/file/578705/hpr4416\\_co](https://www.gov.uk/government/uploads/system/uploads/attachment_data/file/578705/hpr4416_co)  
36 [ver\\_final\\_v3\\_Web.pdf](#) (accessed 26/01/17)

37  
38  
39  
40 [36] Public Health England. Routine childhood immunisations from Summer 2016. London: Public  
41 Health England; 2016.

42  
43 [https://www.gov.uk/government/uploads/system/uploads/attachment\\_data/file/533863/PHE\\_2016](https://www.gov.uk/government/uploads/system/uploads/attachment_data/file/533863/PHE_2016)  
44 [Routine\\_Childhood\\_Immunisation\\_Schedule\\_SUMMER2016.pdf](#) (accessed 26/01/17)

45  
46  
47  
48 [37] Public Health England. Health Protection Report. 10 (32) 23 September 2016. Preliminary  
49 vaccine coverage estimates for the meningococcal B (MenB) immunisation programme for  
50 England, update to the end of August 2016. London: Public Health England; 2016.

51  
52 [https://www.gov.uk/government/uploads/system/uploads/attachment\\_data/file/555057/hpr3216\\_me](https://www.gov.uk/government/uploads/system/uploads/attachment_data/file/555057/hpr3216_me)  
53 [nB.pdf](#) (accessed 26/01/2017)

## TOPIC GUIDE FOR INTERVIEWS

### Process

Interviews will use the following format:

1. **Information Sheet and Consent Form:** Confirm that the participant has read and understood the Participant Information Sheet. Provide the opportunity for the participant to ask any further questions about the interview. Participant completes two copies of the consent form.
2. **Interview:** Ask questions below.
3. **Debrief, Participant Background Information Sheet, Gift Voucher and Contact Details form:** Debrief Participant. Complete *Participant Background Information Sheet*. Provide gift voucher. Participant signs *receipt for gift voucher*. Participant completes *Contact Details form* (if have consented).

### Interview

#### 1. Introductions and Attitudes to Vaccination in general

Name of researcher, name of participant(s) – if a group interview then researcher to state who is sitting where (to aid transcription)

First I would like to ask you your views about vaccinations/immunisation for children

What do you think in general about vaccinations for children?

*Prompt*

- Good/bad thing – why?
- Are there any vaccines in particular about which you have different views?

What do you think about the schedule for childhood vaccines? So this is the timings of doses and of the number of vaccines given

*Prompt*

- OK/busy – why?

Are you aware that the schedule changes from time to time, a new vaccine may be added, the number of doses increased or even doses removed?

Why do you think the schedule changes?

*Prompt*

- New vaccines / Vaccines removed / Different timings / More or fewer doses

What do you think about these changes?

*Prompt*

- Good/bad thing – why?

## 2. Meningococcal B Disease and Vaccine

Have you heard of meningococcal disease? What do you know about it?

*Prompt*

- How is it spread?
- What types of infection does it cause? (meningitis, septicaemia)
- What do you know about meningitis/septicaemia?
- Are there any vaccines in the schedule that protect against meningococcal disease? Which ones?

Have you heard about meningococcal B disease? (MenB)

*Prompt*

- How common is it? / Who is most likely to get it?
- What are the symptoms? (how would you recognise meningitis/septicaemia?)
- What are the risks to young children?
- How does it differ from Men C disease?

Have you heard about the MenB vaccine? What do you know?

*Prompt*

- Immunise at 2, 4 and booster at 12 months (catch up 3, 4 months – only 2 doses if 4 months)
- How does it differ (or not) to Men C vaccine?
- Safety

MenB vaccine has been developed and licensed and at the moment the Dept of Health are deciding whether to introduce it for all children. If the vaccine was introduced:

- What information would you want to be included about *MenB* disease in a leaflet for parents?
- What information would you want to be included about the *MenB* vaccine in a leaflet for parents?

If MenB is given with other vaccines there is an increased risk of fever. How do you feel about fever in your young child - How confident are you in managing fever?

*Prompt*

- Do you worry about it?
- When and why?
- Is it the level (i.e. 39 degrees) / Length of time it lasts? / Discomfort / Worry about fits / brain damage / Masking another illness

How do you manage it?

- When would you seek professional advice – when/from where?

1 The advice is that you give your child paracetamol (sachet) after the first 2 doses (2 and 4 months). You  
2 would be advised to administer this at home (3 times), 1. as soon as possible after the jab, 2. 6-8 hours  
3 later 3. and again 6-8 hours later. This reduces the likelihood of fever without affecting how well the  
4 vaccine works.  
5  
6

7  
8  
9 What do you think about the need to give your child paracetamol after the MenB vaccination?

10  
11 *Prompt*

- 12 • Is it a concern to you – why/why not?
- 13 • Would you do it? (what if no sign of fever?)  
14  
15

16  
17 The GP practice will provide 1 paracetamol dose in a sachet. You need to provide the other 2 doses  
18 yourself.  
19

20  
21 *Prompt*

- 22 • What do you think about that?
- 23 • Do you have paracetamol for children at home?
- 24 • Is it a concern to you – why/why not?  
25  
26  
27

28  
29 What information would you want to be included about *fever after MenB vaccine and paracetamol* in a  
30 leaflet for parents?  
31  
32

33  
34 Would you have the MenB vaccine if it was offered?

35  
36 *Prompt*

- 37 • Would you consider not having the other vaccines at that time point so that your child can have  
38 MenB without the increased risk of fever? Why / why not?  
39  
40  
41

### 42 **3. Delivery of MenB vaccine**

43  
44  
45 When the MenB vaccine is introduced, this will mean that children will have more injections in one visit (3  
46 instead of 2 at both 2 months and 4 months – N.B. until recently they had 3 injections at 4-month visit but  
47 that dose of Men C is removed from schedule now). What do you think about that?  
48  
49

- 50 • Is it a concern to you – why/why not?  
51  
52

53  
54 Given that the risk of fever is increased when MenB is given with other vaccines, how would you prefer  
55 to have it? Why? (i.e. about ¼ get fever with MenB alone, about ¼ with other vaccines alone, but ½ get  
56 fever with MenB AND other vaccines) – the level of fever is no higher than with other vaccines, just more  
57 likely to get it.  
58

- 59 • At the same time (when fever is likely)
- 60 • At a separate visit?

1 At the 12 month visit, it will mean 4 vaccines are given – what would you prefer? Why?

- 2
- 3 • 2 visits with 2 injections at each visit / 3 and 1 / all 4 in one visit
- 4

5 What information would you want to be included about the *number of injections per visit* in a leaflet?

6

7

8

#### 9 **4. Drafts of Materials**

10 Finally, thinking about what we have discussed so far about MenB, I would like you to now look at the 3

11 leaflets and let me know what you think.

12

13

14

15 Go through leaflets in turn, page by page (vary order look at them)

- 17 • 2 minutes guide to MenB
- 18 • MenB full leaflet
- 19 • Paracetamol
- 20
- 21
- 22
- 23
- 24 • What is the most important thing for you to know from this leaflet? (what is next most important etc.?)
- 25 • What is less important?
- 26
- 27 • Should information for the MenB and C vaccines be combined – why/why not?
- 28
- 29 • How do you like the information to be presented – bullet points/pictures/how much detail
- 30
- 31 • Precise wording
- 32
- 33 • Q&A format
- 34
- 35

#### 36 **5. Off label vaccines**

37 What do you think about 'off label' vaccines (it is licenced for different patients/conditions?)

38 *Prompt*

- 39 • Would you let your child have an 'off label' vaccine? Why/why not?
- 40
- 41 • Any particular circumstances?
- 42
- 43
- 44

#### 45 **6. Final Comments**

46 Is there anything else about MenB or childhood vaccines more generally that you want to tell me before

47 we finish?

48

49

50

51

52

53

54

55

56

57

58

59

60

# BMJ Open

## UK parents' attitudes towards meningococcal group B (MenB) vaccination: A qualitative analysis

|                                 |                                                                                                                                                                                           |
|---------------------------------|-------------------------------------------------------------------------------------------------------------------------------------------------------------------------------------------|
| Journal:                        | <i>BMJ Open</i>                                                                                                                                                                           |
| Manuscript ID                   | bmjopen-2016-012851.R2                                                                                                                                                                    |
| Article Type:                   | Research                                                                                                                                                                                  |
| Date Submitted by the Author:   | 21-Mar-2017                                                                                                                                                                               |
| Complete List of Authors:       | Jackson, Cath; University of York, York Trials Unit<br>Yarwood, Joanne; Public Health England<br>Saliba, Vanessa; Public Health England<br>Bedford, Helen; UCL, Institute of Child Health |
| <b>Primary Subject Heading</b>: | Immunology (including allergy)                                                                                                                                                            |
| Secondary Subject Heading:      | Public health, Health services research, Qualitative research                                                                                                                             |
| Keywords:                       | MenB, meningococcal, vaccination, immunisation, immunization                                                                                                                              |
|                                 |                                                                                                                                                                                           |

SCHOLARONE™  
Manuscripts

1 **UK parents' attitudes towards meningococcal group B (MenB) vaccination: A qualitative**  
2  
3 **analysis**  
4  
5  
6

7  
8 Cath Jackson<sup>1</sup>, Joanne Yarwood<sup>2</sup>, Vanessa Saliba<sup>2</sup>, Helen Bedford<sup>3</sup>  
9

10  
11  
12 <sup>1</sup>Department of Health Sciences, University of York, York, UK

13  
14 <sup>2</sup>Public Health England, London, UK

15  
16 <sup>3</sup>Institute of Child Health, UCL, London, UK  
17  
18  
19

20 Corresponding author:

21  
22 Helen Bedford, Professor, UCL Great Ormond Street Institute of Child Health, 30 Guilford Street

23  
24 London, WC1N 1EH [h.bedford@ucl.ac.uk](mailto:h.bedford@ucl.ac.uk) Tel. 020 7905 2333  
25  
26  
27

28 Key words: MenB, meningococcal, vaccination, immunisation, immunization  
29

30 Word count: 4537  
31  
32  
33  
34  
35  
36  
37  
38  
39  
40  
41  
42  
43  
44  
45  
46  
47  
48  
49  
50  
51  
52  
53  
54  
55  
56  
57  
58  
59  
60



**ABSTRACT**

**Objectives:** (1) To explore existing knowledge of, and attitudes, to group B meningococcal disease and MenB vaccine among parents of young children. (2) To seek views on their information needs.

**Design:** Cross-sectional qualitative study using individual and group interviews conducted in February and March 2015, prior to the introduction of serogroup B meningococcal (MenB) vaccine (Bexsero®) into the UK childhood immunisation schedule.

**Setting:** Community centres, mother and toddler groups, parents' homes and workplaces in London and Yorkshire.

**Participants:** 60 parents of children under two years of age recruited via mother and baby groups and via an advert posted to a midwife-led Facebook group.

**Results:** Although recognising the severity of meningitis and septicaemia, parents' knowledge of group B meningococcal disease and MenB vaccine was poor. Whilst nervous about fever, most said they would take their child for MenB vaccination despite its link to fever. Most parents had liquid paracetamol at home. Many were willing to administer it after MenB vaccination as a preventive measure, although some had concerns. There were mixed views on the acceptability of four vaccinations at the 12-month booster visit; some preferred one visit, whilst others favoured spreading the vaccines over two visits. Parents were clear on the information they required before attending the immunisation appointment.

**Conclusions:** The successful implementation of the MenB vaccination programme depends on its acceptance by parents. In view of parents' recognition of the severity of meningitis and septicaemia, and successful introduction of other vaccines to prevent bacterial meningitis and septicaemia, the MenB vaccination programme is likely to be successful. However, the need for additional injections, the likelihood of post immunisation fever and its management are issues

1  
2  
3  
4  
5  
6  
7  
8  
9  
10  
11  
12  
13  
14  
15  
16  
17  
18  
19  
20  
21  
22  
23  
24  
25  
26  
27  
28  
29  
30  
31  
32  
33  
34  
35  
36  
37  
38  
39  
40  
41  
42  
43  
44  
45  
46  
47  
48  
49  
50  
51  
52  
53  
54  
55  
56  
57  
58  
59  
60

about which parents will need information and reassurance from health professionals. Public Health England has developed written information for parents, informed by these findings.

For peer review only

### Strengths and limitations of this study

- This is the only current UK study providing detailed, up-to-date information for Public Health England and primary care health professionals to facilitate the successful implementation of MenB vaccine.
- A mix of parents across parental age, ethnicity and number of children were recruited; these parental characteristics are associated with uptake of childhood vaccination.
- Parents with a university degree or fully-immunised children were over represented in the study.

For peer review only

## UK parents' attitudes to meningococcal group B (MenB) vaccination: A qualitative analysis

### INTRODUCTION

Following the successful introduction of meningococcal C (MenC) vaccine in 1999;[1] serogroup B is the leading cause of meningococcal disease in the UK accounting for 85-90% of all cases and with the highest incidence in infants.[2] In September 2015, the UK introduced routine meningococcal B vaccination (MenB) into the childhood immunisation schedule at two, four and 12 months of age.[3]

The successful implementation of vaccines depends on many factors including parental acceptability. Since meningitis is recognised by parents to be a serious, potentially life threatening infection[4] and the perceived severity of an infection is an important determinant of vaccine acceptance,[5] the prospects for a successful MenB programme are good. However, the introduction of MenB vaccine raises specific issues which may impact on its acceptability for some parents and which need addressing to ensure successful implementation.

First, although MenB is well evaluated in trials and in campaigns,[6, 7] the UK is the first country to introduce Bexsero (a specific MenB vaccine) as a publicly funded programme to help prevent group B meningococcal disease. Second, more injections are needed: a total of three at the two and four-month vaccination visits and four at the 12-month visit. Endorsement by health professionals plays an important role in parental acceptance of multiple injections;[8, 9] however an increasing number of vaccines and multiple injections offered routinely concerns some parents who feel, albeit misguidedly, that too many vaccines may overwhelm their child's immune system.[4] Parents also worry about increased pain and possible adverse events following multiple injections.[9] In the USA, where more vaccines and vaccine doses are recommended, some parents are reported to delay or even decline vaccines.[10] In view of some existing parental concern about the number of vaccines already recommended, there is the potential for this to be mirrored in the UK.

1  
2  
3  
4  
5  
6  
7  
8  
9  
10  
11  
12  
13  
14  
15  
16  
17  
18  
19  
20  
21  
22  
23  
24  
25  
26  
27  
28  
29  
30  
31  
32  
33  
34  
35  
36  
37  
38  
39  
40  
41  
42  
43  
44  
45  
46  
47  
48  
49  
50  
51  
52  
53  
54  
55  
56  
57  
58  
59  
60

Third, when MenB vaccine is administered to infants concomitantly with other vaccines it gives rise to higher levels (51%-61%) of fever ( $\geq 38^{\circ}\text{C}$ ) compared to routine vaccines given alone (23%).[7] To reduce this risk, the Joint Committee on Vaccination and Immunisation recommended that when MenB vaccine is given with the other vaccines at two and four months of age, parents should be advised to administer paracetamol prophylactically.[3] This represents a change in advice on managing fever, based on National Institute for Health and Care Excellence guidance, that anti-pyretics should not be given in anticipation of a fever and only if a child appears distressed.[11] Since fever is also a concern for parents,[12, 13] they will be required to consider the balance of risks between the threat of meningitis and the likelihood of fever following the vaccine.

We aimed to explore parents' knowledge of, and attitudes to, MenB disease and MenB vaccine. We also sought views on their information needs which included commenting on the content of communications developed by Public Health England (PHE). These comments are not presented here as they were fed back directly to PHE.

## METHODS

### Study design

This was a cross-sectional qualitative study.

### Participants and Recruitment

A large body of literature[14-19], identifies two broad categories of parental factors influencing uptake of childhood vaccination. The first relates to socioeconomic disadvantage where, despite being motivated to have their children vaccinated, parents lack access to resources and support to overcome logistical barriers such as no private transport (access). The second relates to parents' concerns about the safety or beliefs about the necessity of vaccines (acceptance). To ensure that we spoke with parents in both categories, we set out to recruit 60 parents of children under the age of two years across different parental age, socio-economic status (using education as a proxy), ethnicity and number of children.

1 Parents were recruited in London and Yorkshire. In London, parents were recruited in five  
2  
3 Children's Centres (CC) from two London districts which were selected for their socio-demographic  
4  
5 mix. Written permission was secured to conduct the study in these CCs. HB attended mother and  
6  
7 baby sessions in the CCs and distributed study information to parents, returning a week later to  
8  
9 conduct interviews with consenting parents. In Yorkshire, parents were recruited from two mother  
10  
11 and toddler groups (after securing permission from group leaders) by distributing study information  
12  
13 and via an advert posted to a midwife-led Facebook group. Interested mothers contacted CJ for  
14  
15 more information and interviews were conducted subsequently. We did not formally record how  
16  
17 many parents were approached and then agreed/declined to be interviewed.  
18  
19

### 20 21 22 **Data Collection**

23  
24 Individual and group interviews were conducted by CJ and HB in February and March 2015 prior to  
25  
26 the announcement of the introduction of MenB vaccine. Both have considerable experience as  
27  
28 immunisation researchers; and HB was previously a health visitor. They presented themselves to  
29  
30 participants as independent to the MenB vaccination programme and advised that any specific  
31  
32 questions about immunisation would be answered after the interviews. The written study  
33  
34 information reassured parents that they could end/leave the interview at any point without offering  
35  
36 a reason why. Parents who individually contacted the research team to participate were  
37  
38 interviewed on their own in their home or workplace. Parents recruited through the CCs and  
39  
40 mother and toddler groups took part in group interviews conducted away from the main mother and  
41  
42 baby session. The topic guide (see Supplementary File 1) was piloted with four parents of children  
43  
44 under the age of two years. No changes were made. Interviews explored:  
45

- 46 • Awareness of MenB disease and vaccine
- 47
- 48 • Perceptions of fever
- 49
- 50 • Attitudes to use of paracetamol as a prophylactic for fever
- 51
- 52 • Attitudes to an increased number of injections at each vaccination visit
- 53
- 54 • Preferences for the number of injections at each vaccination visit
- 55
- 56 • The most important information needed in the MenB leaflets
- 57
- 58
- 59
- 60

1  
2 In the group interviews the researcher asked participants in turn to respond to the interview  
3 questions. Individual interviews lasted between 28 and 57 minutes. Group interviews lasted  
4 between 30 and 65 minutes. All interviews were digitally audio-recorded.  
5  
6  
7  
8

### 9 10 **Data Analysis**

11 The audio-recordings were transcribed verbatim and personal data anonymised. The individual  
12 and group interview data were analysed together using the six steps of thematic analysis. This is a  
13 method of 'identifying, analysing and reporting patterns (themes) within the data'. [20 p4] It is a  
14 useful approach for producing qualitative analyses suited to informing programme development.  
15  
16  
17  
18

19 The six steps were as follows:  
20

- 21 • Familiarisation: Both researchers (CJ and HB) became immersed in the raw data by 'repeated  
22 reading' of the transcripts and listed key ideas for coding.  
23
- 24 • Generating initial codes: Initial codes and a coding framework were developed by CJ, informed  
25 predominantly by the study objectives (a deductive approach), although novel views expressed  
26 by participants were also captured (an inductive approach). The interview data were then  
27 coded by CJ to this framework using Nvivo Version 10 software.  
28
- 29 • Searching for themes: The codes were then organised by CJ into potential themes and  
30 subthemes. At this point similarities and differences in views across education, ethnicity and  
31 number of children were explored.  
32
- 33 • Reviewing themes: The coded data within each potential theme were reviewed by CJ and HB  
34 and the themes modified to ensure that they formed a coherent pattern. Each theme was then  
35 reviewed to see if it 'worked' in relation to the entire data set.  
36
- 37 • Defining and naming themes: A short paragraph was produced by CJ for each theme and  
38 subthemes to define the 'essence' of the theme/subthemes and names were allocated.  
39
- 40 • Producing the report: The thematic analysis was written up by CJ.  
41  
42  
43  
44  
45  
46  
47  
48  
49  
50  
51  
52  
53  
54

### 55 **Ethics approval**

56 University College London Research Ethics Committee approved the study and parents gave  
57 written informed consent to take part.  
58  
59  
60

## FINDINGS

### Participants

Information was gathered from 60 parents (Table 1) through seven individual and 12 group interviews (range 2-7 parents). Whilst the sample size was pre-specified, data saturation occurred in that no new relevant knowledge emerged in the final few interviews. Two thirds (62%) lived in London and one third (38%) were from Yorkshire. Participants were predominantly female (92%) and two thirds (65%) were first time parents. Their age range was 20-43 years. Half were White British (55%). Half (55%) were educated to Bachelor degree or higher. Two parents were medically trained. Participants' children (n=62) ranged from 12 days to 24 months of age. Almost all participants (92%) self-reported that their child/children were fully immunised.

**Table 1:** Parent characteristics

|                                   |                           | N  | %  |
|-----------------------------------|---------------------------|----|----|
| Site                              | London                    | 37 | 62 |
|                                   | Yorkshire                 | 23 | 38 |
| Gender                            | Male                      | 5  | 8  |
|                                   | Female                    | 55 | 92 |
| Ethnicity                         | White British             | 33 | 55 |
|                                   | White Other               | 10 | 16 |
|                                   | Black British Caribbean   | 4  | 7  |
|                                   | Black African             | 5  | 8  |
|                                   | Asian Chinese             | 1  | 2  |
|                                   | Asian Other               | 4  | 7  |
|                                   | Missing                   | 3  | 5  |
| Highest Educational Qualification | GSCE or equivalent        | 6  | 10 |
| Qualification                     | A level or equivalent     | 15 | 25 |
|                                   | Bachelor degree or higher | 33 | 55 |



|                                             |               |                  |                   |
|---------------------------------------------|---------------|------------------|-------------------|
|                                             | Missing       | 6                | 10                |
| No. Children                                | One           | 39               | 65                |
|                                             | More than one | 20               | 33                |
|                                             | Missing       | 1                | 2                 |
| Self-reported                               | Full          | 55               | 92                |
| Immunisation Status of Children             | Partial       | 3                | 5                 |
|                                             | None          | 1                | 2                 |
|                                             | Missing       | 1                | 2                 |
|                                             |               | <b>Mean (SD)</b> | <b>Range</b>      |
| Mean Age of Parent (years)                  |               | 31.6 (5.10)      | 20-43             |
| Mean Age of Children under 2 years (months) |               | 8.7 (5.60)       | 12 days-24 months |

## Parents' Views

We report findings based on thematic analysis of the data. Where views differ according to parents' characteristics these are indicated. Illustrative quotes are presented throughout.

### Views on MenB Disease and Vaccination

#### *Knowledge about MenB and Perception of Risk of the Disease*

Although most parents were unfamiliar with the term 'meningococcal disease', they had heard of meningitis, recognising it to be life threatening and needing urgent medical attention. They identified high temperature, fever and a rash (recognised using the glass test) as symptoms to look out for (Quote 1, Table 2). Parents were generally unsure of details of how meningococcal infection spreads, its incidence and who is most likely to catch it (Quote 2, Table 2). A minority of parents mentioned different strains (commonly C) but they were less aware of how strains differ, although it was suggested the difference was viral-bacterial or due to severity. Parents were generally less knowledgeable about septicaemia but knew it to be serious. Four parents who were well informed about both forms of meningococcal disease were either medically trained or had paid privately for their children to have the MenB vaccination.

### Knowledge of and Attitudes to MenB Vaccine

Some parents knew that there were vaccines in the schedule to protect against meningococcal disease, they most commonly mentioned MenC. Most had not heard of MenB vaccine. Because of this parents did not initially identify any safety concerns associated with MenB vaccine, although a small minority talked about feeling nervous when a new vaccine is introduced and their concerns that it has been sufficiently tested (Quote 3, Table 2). The four parents who were well informed about MenB disease were also knowledgeable about MenB vaccine although a GP had not yet heard about it in her professional role (Quote 4, Table 2).

**Table 2:** Illustrative Quotes – Knowledge of, and attitudes to, MenB disease and vaccination

|   |                                                                                                                                                                                                                                                                                                                                                                                                                                                                                                                  |
|---|------------------------------------------------------------------------------------------------------------------------------------------------------------------------------------------------------------------------------------------------------------------------------------------------------------------------------------------------------------------------------------------------------------------------------------------------------------------------------------------------------------------|
| 1 | <p>Q. So what do you know about meningitis?<br/> <i>I know that it can cause fatality, it's very important to be identified quickly, and get the child medical help as, as soon as possible; and you usually associate it with the rash, like you know the clear glass you put on the, on the rash, it doesn't go away.</i><br/> Y004a (White British Father, fully immunised children, individual interview)</p>                                                                                                |
| 2 | <p><i>How it can come on, it can progress, that, I mean I wouldn't know that, so, and I wouldn't know the symptoms of it either.... or if they did have it, you know, I wouldn't know what would be worrying or what; I mean, you know, kids get fevers and they get, you know, ear infections, chest infections, things like that, but I wouldn't know what would mean it's this, how would you know it's definitely this?</i><br/> Y008a (White British Mother, fully immunised children, group interview)</p> |
| 3 | <p><i>It's gonna need more information, I think, because it's a new vaccine, everyone's gonna be wary of it, it's not an old vaccine that's been around for years already, and I think for a new vaccine they're gonna need to put more information than that on it, personally, because obviously everyone's gonna be wary of it.</i><br/> L007g (Asian British Mother, non-immunised children, group interview)</p>                                                                                            |
| 4 | <p>Q: So you hadn't heard of it in your role as a GP?<br/> <i>No. No, I hadn't heard of it, and, and it does tend to be at the point of implementation that we, we tend to hear...cos there's so much, so much going on I suppose all the time.</i><br/> Y009a (White British Mother, fully immunised children, group interview)</p>                                                                                                                                                                             |

### Views on the Increased Risk of Fever following Vaccination

#### Managing Fever

Most parents expressed worry about fever; particularly its cause and how it might progress, for example febrile convulsions (Quote 1, Table 3). They described a variety of strategies to manage fever: removing clothing, applying a damp cloth/putting the child in the bath, checking the child's temperature and administering liquid paracetamol (identified as Calpol®). Whilst many parents discussed using Calpol®, a small number acknowledged that it cannot be used extensively with

1 very young babies (Quote 2, Table 3). Some recognised that their confidence in managing fever  
 2 had developed as their child got older as they 'could gauge' the child better (Quote 3, Table 3).  
 3  
 4

### 5 6 7 *Concerns about Fever*

8  
9  
10 Most parents described becoming concerned about fever based on their child's temperature and if  
 11 it persists (Quote 4, Table 3). At this point, they would seek advice from their GP or Health Visitor,  
 12 telephone 111, or if very concerned go to Accident and Emergency. First time mothers were more  
 13 likely to report seeking help immediately, often from a knowledgeable family member.  
 14  
 15  
 16  
 17

### 18 19 *Fever caused by Vaccination*

20  
21 Some parents said that they would be less worried knowing a fever is caused by vaccination in  
 22 that, to some extent, it is expected (Quote 5, Table 3) with a few commenting that fever is  
 23 preferable to meningitis (Quote 6, Table 3).  
 24  
 25  
 26  
 27

28  
29  
30 Other parents expressed concern that a vaccine would elicit fever. Several of these, most of whom  
 31 were first time parents, talked about this being particularly worrying when their child is two months  
 32 old. This was because it is their first appointment for vaccinations, they don't know their baby well  
 33 yet and cannot administer much Calpol® to a child so young (Quote 7, Table 3).  
 34  
 35  
 36  
 37  
 38  
 39

### 40 41 *Would the Fever deter parents from accepting MenB Vaccine?*

42  
43 The overwhelming majority of parents said that despite the link with fever, it would not prevent  
 44 them having MenB vaccine. A few explained that this is because they trust that it has been tested  
 45 and is safe (Quote 8, Table 3). A minority talked about making specific preparations such as,  
 46 considering the timing of the appointment (Quote 9, Table 3) or looking into this vaccination very  
 47 carefully to be reassured it is worth having.  
 48  
 49  
 50  
 51  
 52  
 53  
 54

55 **Table 3:** Illustrative Quotes – Views on Fever

|                            |                                                                                                                                                                                                                                                                                                                                                             |
|----------------------------|-------------------------------------------------------------------------------------------------------------------------------------------------------------------------------------------------------------------------------------------------------------------------------------------------------------------------------------------------------------|
| 56<br>57<br>58<br>59<br>60 | 1<br>2<br>3<br>4<br>5<br>6<br>7<br>8<br>9<br>10<br>11<br>12<br>13<br>14<br>15<br>16<br>17<br>18<br>19<br>20<br>21<br>22<br>23<br>24<br>25<br>26<br>27<br>28<br>29<br>30<br>31<br>32<br>33<br>34<br>35<br>36<br>37<br>38<br>39<br>40<br>41<br>42<br>43<br>44<br>45<br>46<br>47<br>48<br>49<br>50<br>51<br>52<br>53<br>54<br>55<br>56<br>57<br>58<br>59<br>60 |
|----------------------------|-------------------------------------------------------------------------------------------------------------------------------------------------------------------------------------------------------------------------------------------------------------------------------------------------------------------------------------------------------------|

1  
2  
3  
4  
5  
6  
7  
8  
9  
10  
11  
12  
13  
14  
15  
16  
17  
18  
19  
20  
21  
22  
23  
24  
25  
26  
27  
28  
29  
30  
31  
32  
33  
34  
35  
36  
37  
38  
39  
40  
41  
42  
43  
44  
45  
46  
47  
48  
49  
50  
51  
52  
53  
54  
55  
56  
57  
58  
59  
60

|                                                                                  |                                                                                                                                                                                                                                                                                                                                                                                                                                                                                                                                                                                                                                                                                                                                                                                                            |
|----------------------------------------------------------------------------------|------------------------------------------------------------------------------------------------------------------------------------------------------------------------------------------------------------------------------------------------------------------------------------------------------------------------------------------------------------------------------------------------------------------------------------------------------------------------------------------------------------------------------------------------------------------------------------------------------------------------------------------------------------------------------------------------------------------------------------------------------------------------------------------------------------|
| 1<br>2<br>3<br>4<br>5<br>6                                                       | <i>really hard to manage cos you don't know what to do, cos you don't know whether you should be putting cold, cold towel on them like, but you don't wanna shock their body into like all this cold, coldness at once, cos that's where they start, they start fitting. She had a, a small little fit, like a small convulsion, cos she got too hot.</i><br>L007g (Asian British Mother, non-immunised children, group interview)                                                                                                                                                                                                                                                                                                                                                                         |
| 7<br>8<br>9<br>10<br>11<br>12<br>13<br>14                                        | 2 <i>See that's, the only, the only problem that you have with that is that when they're eight weeks old, no, four weeks old, anything under the, under the age of three months you have to be careful how much Calpol and stuff you can give them, and the only thing you can give them is Calpol. So they are really careful, they, they do tell you to be really careful, but. So if they get a really bad fever, you can only give them one dose of Calpol in a 24 hour period, and that's the 2.5. I mean that should work, but if it didn't you're a bit stuck as a parent as to what you can do to help baby settle down.</i><br>Y006a (White British Mother, fully immunised children, group interview)                                                                                            |
| 15<br>16<br>17<br>18<br>19<br>20<br>21<br>22<br>23                               | 3 <i>I feel that now she's nine months I'm, I'm more confident when she gets sick or has, has had a fever now, I understand her more and I have natural instincts of how to look after her and how bad she is I can gauge, where when she was younger and she did get a fever from some, the, I think it was the two months, the sixteen week one, I'm not sure, that I was so scared when she was, fell ill and, you know, the, the only kind of conversation you get is, if they should get a temperature give them Calpol, but you're just so stressed as it is when they're so young that to have it so, to have it so young is just, to gauge the fever that young is more scary than when they are older, yeah.</i><br>L008d (British Philippines Mother, fully immunised children, group interview) |
| 24<br>25<br>26<br>27<br>28                                                       | 4 <i>It (NHS Choices) tells you if a temperature lasts more than three, seventy two hours that you should be worried. I know from my personal experience when (name of daughter) had a temperature and I have, and it's not been breaking for more than about forty-eight hours, that's when I've started to worry.</i><br>L005a (White British Mother, fully immunised children, individual interview)                                                                                                                                                                                                                                                                                                                                                                                                    |
| 29<br>30<br>31<br>32<br>33                                                       | 5 <i>And, and what I find reassuring with the imm, immunisation induced fevers you sort of know what it is, whereas if it's just a random, you know, incident, you'd never, I don't know, I'd be more worried if I, if it was non-immunisation related.</i><br>L001a (White British Mother, fully immunised children, group interview)                                                                                                                                                                                                                                                                                                                                                                                                                                                                     |
| 34<br>35<br>36<br>37<br>38<br>39<br>40<br>41<br>42                               | 6 <i>It's better than meningitis.</i><br>Y007a (White British Mother, fully immunised children, group interview)<br><br><i>I'd rather him have a fever...</i><br>Y007b (White British Mother, fully immunised children, group interview)<br><br><i>That's what I mean, you can, you can control fever with Calpol and certain things. If they get baby ill from not having the vaccine, it's a lot harder to control than a fever.</i><br>Y007a                                                                                                                                                                                                                                                                                                                                                            |
| 43<br>44<br>45<br>46                                                             | 7 <i>I, I wouldn't be happy with it. Cos at two months you've not given her paracetamol before and you don't know what the side effects are. If she had a fever I would give it to her. But no, I wouldn't like the idea of, personally, at so young.</i><br>L004a (White British Mother, fully immunised children, group interview)                                                                                                                                                                                                                                                                                                                                                                                                                                                                       |
| 47<br>48<br>49<br>50<br>51<br>52<br>53<br>54<br>55<br>56<br>57<br>58<br>59<br>60 | 8 <i>Q. Would you have it for your baby if the MenB vaccine was introduced?</i><br><br><i>I'd be so worried about a brand new vaccine, like our generation being kind of tested on it almost, but I think if it was the fact that everyone did and it's, I probably would, I'd be worried about it though, but I would, if it was, yeah.</i><br>L003c (Black British African Mother, fully immunised children, group interview)<br><br><i>Q. Because it's a new thing?</i><br><br><i>Yeah, it's a new thing and they've been tested, you know, but I think, I think I would.</i><br>L003c<br><br><i>Yeah, again I probably would, I mean it, I would probably, the increased risk of fever would</i>                                                                                                       |

|   |                                                                                                                                                                                                                                                                                                                                                                                                                                                                                                                                                                                                                                                                                                                                                                                                                                                |
|---|------------------------------------------------------------------------------------------------------------------------------------------------------------------------------------------------------------------------------------------------------------------------------------------------------------------------------------------------------------------------------------------------------------------------------------------------------------------------------------------------------------------------------------------------------------------------------------------------------------------------------------------------------------------------------------------------------------------------------------------------------------------------------------------------------------------------------------------------|
|   | <p><i>be worrying, but I think if there's anything that they can be protected against, I tend to just go along with what the government are recommending, and if they, if they say it's safe and I tend to just believe that that's, that's true (laughs) trust that it's true, and, and go with it, and I think I'd rather have them immunised against something and have a little bit of a fever for a day than not, and just them, them catching something awful. (laughs)</i><br/>L003g (White British Mother, fully immunised children, group interview)</p> <p><i>I'd still have to be so convinced that it was worth it for, to have fever and for them to be having extra stuff in their bodies....I'd need to be really convinced it was worthwhile.</i><br/>Y003a (Polish Mother, partially immunised children, group interview)</p> |
| 9 | <p><i>Q. Does that (the fever) change how you feel about taking him?</i></p> <p><i>It doesn't, for me not necessarily, no, cos I suppose at least if you know it's gonna happen you can be equipped with the tools to deal with it, and you can be practical in terms of when you go and have that done and being ready for it and working around it.</i><br/>Y005a (White British Mother, fully immunised children, individual interview)</p>                                                                                                                                                                                                                                                                                                                                                                                                 |

## Acceptability of Administering Paracetamol Post-vaccination

### *Routine Administration of Paracetamol*

Most parents said that they have Calpol® at home and routinely use it, although not when a child is only two months old (Quote 1, Table 4). A small minority of parents described having difficulties giving their child Calpol® as he/she spits it out. Two parents appeared to not know that Calpol® is liquid infant paracetamol. A few parents (one GP) pointed out that the regular instructions for administering Calpol® to a two-month old baby are different to the advice for use of paracetamol post MenB vaccination; and that this inconsistency might worry and confuse parents (Quote 2, Table 4). Two parents did not agree with giving their child paracetamol because of concerns about its side effects and the view that it is used far more routinely in the UK compared to their home country (Quote 3, Table 4).

### *Administration of Paracetamol as a Preventive Measure*

Views on parents' willingness to administer prophylactic paracetamol after MenB vaccination differed. Many parents would be willing to administer paracetamol on the assumption that this is best for their child, even if they were worried about doing so (Quote 4, Table 4). However, questions were raised about whether they should wake a sleeping baby to administer a dose, or whether the third dose could be given the following morning, and what should they do if they forgot to give the paracetamol or if the paracetamol does not work (Quote 5, Table 4).



1  
2  
3  
4  
5  
6  
7  
8  
9  
10  
11  
12  
13  
14  
15  
16  
17  
18  
19  
20  
21  
22  
23  
24  
25  
26  
27  
28  
29  
30  
31  
32  
33  
34  
35  
36  
37  
38  
39  
40  
41  
42  
43  
44  
45  
46  
47  
48  
49  
50  
51  
52  
53  
54  
55  
56  
57  
58  
59  
60

However, a few parents expressed worries about administering prophylactic paracetamol. Reasons for this were a preference not to give paracetamol to their child generally, that their child struggles to take paracetamol (they spit it out), a worry about putting something else into the child's body after vaccination and that paracetamol might mask vaccine side effects. Several of these parents explicitly stated that they would not give their child the paracetamol after MenB vaccination unless the child develops a fever (Quote 6, Table 4).

**Table 4:** Illustrative quotes - Acceptability of Administering Paracetamol Post-vaccination

|   |                                                                                                                                                                                                                                                                                                                                                                                                                                                                                                                                                                                                              |
|---|--------------------------------------------------------------------------------------------------------------------------------------------------------------------------------------------------------------------------------------------------------------------------------------------------------------------------------------------------------------------------------------------------------------------------------------------------------------------------------------------------------------------------------------------------------------------------------------------------------------|
| 1 | <p><i>Q. Has everybody got paracetamol at home?</i></p> <p><i>About two months I didn't, but now he's getting a bit older I have got some in, in, just in case, cos of teething and vaccinations and everything else. But at, at, at two months probably not.</i></p> <p>L007e (White British Mother, fully immunised children, group interview)</p>                                                                                                                                                                                                                                                         |
| 2 | <p><i>People will worry about, cos it says, the, the advice on the bottle is from three months and then there's just like a one-off post-immunisation dose in younger ones. So you'd have to be quite clear that it was safe; I think parents will worry about the safety of giving more than, more paracetamol than is prescribed on the bottle you're buying.</i></p> <p>Y009a (White British Mother, fully immunised children, individual interview)</p>                                                                                                                                                  |
| 3 | <p><i>I have allergic just when you're saying paracetamol. I'm not agreeing with paracetamol. I know a whole country they been treating with paracetamol but I don't accept this.</i></p> <p><i>Q: But in terms of fever and how to deal with it?</i></p> <p><i>It, but you under, just look, they treat you with everything, all sickness they give you paracetamol, it's can't be, can't be helpful this stuff. But if you understand me, I don't, I'm not gonna use paracetamol.</i></p> <p>L002a (Polish Mother, fully immunised children, group interview)</p>                                          |
| 4 | <p><i>I suppose if I knew it was gonna stop him being unwell I'd do it. So I suppose if they're saying there's a higher risk that he's gonna be unwell straight after it, give him Calpol to try and make him comfortable I wouldn't have a concern with that. But yeah, I mean I don't think as a mum you'd want your child to be in any pain so if someone tells you take this and it's not gonna hurt you'd do it wouldn't you?</i></p> <p>Y005a (White British Mother, fully immunised children, individual interview)</p>                                                                               |
| 5 | <p><i>What if the paracetamol actually doesn't lower the fever then at what point do I say, you know, cos if I go to the doctors and say, oh, you know, he's had the vaccinations but he's got a fever, and they tend to say, oh yeah, it's absolutely fine, it's due to the vaccinations, but then at what point do I say, OK, well he has had the vaccinations but the fever's carried on going up, paracetamol's not working, given him Ibuprofen, what now?</i></p> <p>L008c (Black British African Mother, fully immunised children, group interview)</p>                                               |
| 6 | <p><i>I think if it was me as well I would have issues about the appropriateness of just giving (name of daughter) paracetamol for the sake of giving her paracetamol when she's not got a temperature. So I could understand, I think I would feel happier giving her a dose of paracetamol for, for a temperature rather than a dose of paracetamol just for the sake of having paracetamol. I don't think I would probably give (name of daughter) the paracetamol, if she was asleep I wouldn't wake her up.</i></p> <p>L005a (White British Mother, fully immunised children, individual interview)</p> |

## Acceptability of four injections at the 12-Month Booster Visit

Most parents were accepting of the vaccination schedule, trusting that it is informed by sound research and therefore safe (Quote 1, Table 5). A small number mentioned that the schedule is complex and busy which can be particularly hard to 'keep a handle on' with a new baby. Views on the acceptability of four injections at the 12-month appointment differed.

Some parents (often with more than one child) preferred all four injections in one visit. This view was based on practical reasons such as the inconvenience of booking and finding time to attend multiple appointments, particularly for those mothers who have returned to work by 12 months (Quote 2, Table 5). They acknowledged that there would be an increased likelihood of them missing appointments if they are on different days. These parents also talked about preferring to 'get it all over with in one go' in terms of reducing distress to the child at the appointment and afterwards (Quote 3, Table 5). A few of these parents spoke about their child being more 'robust' by 12 months and so they felt more comfortable in taking them for multiple injections at that age.

Just over half of parents expressed a preference to separate the vaccines over different visits with most preferring two injections at two visits a month apart, although two parents wanted even more visits with fewer injections at each. These preferences were predominantly to avoid fever (if that is associated with the MenB vaccine at this age) and distress to the baby on the day (Quote 4, Table 5). A small number of parents talked about preferring to avoid overloading their child's immune system with multiple vaccines. These issues were more important for these parents than the potential inconvenience of multiple appointments.

A few parents suggested that they should be given a choice about the 12-month booster visit as they know what works best for their child. Similar numbers of parents disagreed, preferring to be offered the safest approach, as well as acknowledging the difficulty of implementing a choice system.

**Table 5:** Illustrative quotes – Acceptability of four vaccines at 12-month booster visit

|   |                                                                                                                                                                                                                                                                                                                                                                                           |
|---|-------------------------------------------------------------------------------------------------------------------------------------------------------------------------------------------------------------------------------------------------------------------------------------------------------------------------------------------------------------------------------------------|
| 1 | <i>I just put my trust in the fact that it's the best thing for her and I'm sure the healthcare professionals know what they are doing and so I don't think about it too much.</i>                                                                                                                                                                                                        |
| 2 | L004b (White British Mother, fully immunised children, group interview)                                                                                                                                                                                                                                                                                                                   |
| 3 | <i>I just, with having two really young children, the logistics of getting a doctor's appointment, getting there, and if, it sounds odd but if they're gonna be ill anyway, and as long as the fever's not more dangerous, I'm not too, I, I don't feel strongly.</i>                                                                                                                     |
| 4 | L001a (White British Mother, fully immunised children, group interview)                                                                                                                                                                                                                                                                                                                   |
| 5 | <i>I know it's not nice when they're having it done, but it only lasts for a few minutes, and I think for the sake of having the whole build up of going back again for another set and will they get another fever again and will it happen again, I think sometimes it's just... Best to get it all out of the way, let them have their five minutes' cry and forget it. (laughter)</i> |
| 6 | L003c (White British Mother, fully immunised children, group interview)                                                                                                                                                                                                                                                                                                                   |
| 7 | <i>I'll prefer to split because her immune system, you know, can be built and have a chance; if you give too much, you never know what could happen. OK, it's in one sense that's like, you know, we have to come back a few times, but on the other hand it's my baby, you know, health, so...</i>                                                                                       |
| 8 | L003a (Polish Mother, partially immunised children, group interview)                                                                                                                                                                                                                                                                                                                      |

## Information Needs

### *Information about MenB Disease*

Parents wanted to understand why MenB disease is something they need to vaccinate their child against. To achieve this, they wanted to know: how to recognise it, what are the signs and symptoms (identified as the most important information; Quote 1, Table 6) and how many people catch it. They were also interested in: who is most at risk, how it spreads and how it is different to other strains of meningococcal disease.

### *Information about MenB Vaccine*

Parents identified the most important information to be about the vaccine's short and long term side effects, likely occurrence and how to respond to them (Quote 1, Table 6). They also wanted information that compares the benefits versus the risks of the vaccine, facts on how it has been tested and if it has been used elsewhere. Other details of the vaccine that parents were interested in were: the reason it is needed in addition to MenC vaccine, why it does not protect against all meningococcal disease and how it is administered (number and timing of doses, injection/oral/nasal spray). They also wanted to understand why it causes fever, the likelihood of fever if administered alongside other vaccines and what would prevent their child having the injection on the day.



### Information about Fever and Paracetamol

Parents identified the most important information about fever and paracetamol to be about how to administer paracetamol following MenB vaccination (dose, frequency, what happens if it does not work (Quote 2, Table 6). They also wanted to be informed of alternatives to giving paracetamol, and advised whether they should wake a sleeping baby to administer the paracetamol.

Understanding what level and length of fever is normal, when should they be concerned and where should they go to seek help was also a priority.

### Timing of Information

Most parents preferred to have information about MenB vaccine and the associated fever before they attend the appointment (Quote 3, Table 6). Suggested methods of doing this were: sending the leaflet out with the invitation letter, giving it to the parent when they book the appointment at the GP practice or the practice nurse/health visitor providing it in routine appointments a few weeks before. A few parents said that whilst they would prefer to receive the Men B vaccine leaflet in advance, they would want the paracetamol leaflet at the appointment as that is the time they will focus on the specifics of timing and dosage (Quote 4, Table 6). Two parents talked about preferring to have information about all vaccinations before the baby is born as they had time and 'headspace' then to read it (Quote 5, Table 6).

**Table 6:** Illustrative quotes – Information needs

|   |                                                                                                                                                                                                                                                                                                                                                                                                                                                                                                                                                                                                   |
|---|---------------------------------------------------------------------------------------------------------------------------------------------------------------------------------------------------------------------------------------------------------------------------------------------------------------------------------------------------------------------------------------------------------------------------------------------------------------------------------------------------------------------------------------------------------------------------------------------------|
| 1 | <p><i>Well I like, obviously that, you know, this would make me, the statistics would make me think oh right, I need to get that done, the fear of the disease, you know, knowing what it is and what it can do would make, help me make the decision as well. And then, but then this one has all about the signs and symptoms and things like that, which, I mean you would want to know especially after the injection, more information about how to deal with the effects of the illness itself.</i></p> <p>Y008a (White British Mother, fully immunised children, individual interview)</p> |
| 2 | <p><i>Q. What's the most important issue for you to know about the paracetamol and fever? What's the key thing the leaflet needs to include?</i></p> <p><i>How much.</i></p> <p>Y007e (White British Father, fully immunised children, group interview)</p> <p><i>How often.</i></p> <p>Y007b (White British Mother, fully immunised children, group interview)</p> <p><i>...like a big space in sort of like, cos it only says here, I mean a lot of people might skim over</i></p>                                                                                                              |

|                                             |                                                                                                                                                                                                                                                                                                                                                                                                                                                                                                                                                                                                                                                       |
|---------------------------------------------|-------------------------------------------------------------------------------------------------------------------------------------------------------------------------------------------------------------------------------------------------------------------------------------------------------------------------------------------------------------------------------------------------------------------------------------------------------------------------------------------------------------------------------------------------------------------------------------------------------------------------------------------------------|
| 1<br>2<br>3<br>4<br>5<br>6<br>7<br>8        | <i>that or misread it, for the dose</i><br>Y007d (White British Mother, fully immunised children, group interview)<br><br>Q. <i>So the dose is the key thing you want guidance on?</i><br><br>Yeah.<br>Y007d                                                                                                                                                                                                                                                                                                                                                                                                                                          |
| 9<br>10<br>11<br>12<br>13<br>14<br>15<br>16 | 3 Q. <i>When would you want to get this leaflet, when would it be most useful?</i><br><br><i>I guess maybe with the letter that you get to take, you know. Yeah, cos I wouldn't want it to arrive for the vaccination and be like, right, here's a leaflet do you want it now? I'd be like oh my gosh, I don't know, but maybe with a letter when you're due for your vaccination saying, you know, this is the new one, would you be happy to have it? At least then I can book then...</i><br>Y008a (White British Mother, fully immunised children, individual interview)                                                                          |
| 17<br>18<br>19<br>20<br>21                  | 4 <i>I would want this on the day at the time as you would if you were going for anything to your doctors, so that you can use it as a, a refer to for whatever treatment you've then got to follow when you get home.</i><br>Y005a (White British Mother, fully immunised children, individual interview)                                                                                                                                                                                                                                                                                                                                            |
| 22<br>23<br>24<br>25<br>26<br>27<br>28      | 5 <i>Um (pause) probably before they have the baby, I think, because when you've just had a baby and you're all over the place and your life is completely turned upside down and then you have to take your sleep deprived self and the baby at eight weeks to have their first vaccination, I think, you know, even if people don't read it, when they go to antenatal classes or the midwife gives them it, I think you're more likely when you're pregnant to have the time to do it, especially when it's your first baby, when you're more focused on just that.</i><br>L001a (White British Mother, fully immunised children, group interview) |

## DISCUSSION

This study explored parents' knowledge of and attitudes to MenB disease and of MenB vaccine, and parents' information needs to inform (a) the introduction of the MenB vaccine into the childhood schedule and (b) the information materials developed by PHE. To our knowledge this is the only *current* UK study providing detailed, up-to-date information for PHE and primary care health professionals to facilitate the successful implementation of MenB vaccine.

Our aim was to capture the views of parents across the two broad categories of parental factors that influence uptake of childhood vaccination (socio-economic disadvantage, concern about safety or necessity of vaccines)[13-18]. Although the proportion of parents in this study with a university degree (55%) was higher than the proportion reported nationally for a comparable age group (about 40%),[21] diversity was achieved in other factors which are associated with uptake of childhood vaccination, namely ethnicity, parental age and number of children. We recruited in settings outside the NHS increasing the likelihood of speaking to parents with a range of views. We have no reason to believe that the parents in this study from Yorkshire and London are markedly

1  
2 different to other parents in the UK; either in terms of their social contexts which impact on their  
3  
4 access to immunisation services or their acceptance of immunisation. With the exception of one  
5  
6 mother, the parents self-reported to be full or partial immunisers, reflecting the parents most likely  
7  
8 to attend for MenB vaccination.  
9

10  
11 We investigated similarities and differences in views across parents of different education, ethnicity  
12  
13 and number of children; and only identified a small number of differing views according to the  
14  
15 number of children a parent had. As with all interview studies, there may have been some “social  
16  
17 desirability” in participants’ accounts and responses could have been influenced by others in the  
18  
19 group interviews. These group interviews were usually with mothers attending the same mother  
20  
21 and baby group, or groups of friends and couples. They were typically lively discussions and we  
22  
23 observed many frank exchanges of opinion with conflicting views emerging on several issues. This  
24  
25 is reassuring. Moreover, the parents interviewed all had very young children, they had recent  
26  
27 experience of the immunisation process and of making immunisation decisions. However, at the  
28  
29 time of the study the introduction of MenB vaccine had not yet been announced and so parents’  
30  
31 views about the vaccine, in particular, whether it would be acceptable were hypothetical.  
32  
33  
34  
35

36 Although most of the parents surveyed were not familiar with the term meningococcal disease,  
37  
38 they recognised meningitis and septicaemia to be serious, life threatening conditions. In their  
39  
40 consideration of MenB, it was clear that for these parents, trusting the NHS and, by definition,  
41  
42 health professionals, is a key influence on their acceptance of vaccines. This is a finding that has  
43  
44 been repeatedly reported elsewhere.[22,23] This was evident in the view expressed by many  
45  
46 parents that they will accept new vaccines or changes to the schedule because they trust the NHS  
47  
48 to make evidence-based decisions and in particular, that vaccines have been appropriately tried  
49  
50 and tested.  
51  
52

53  
54 This also appeared to be the case for fever, if pre-warned that this is a likely consequence of MenB  
55  
56 vaccine, most would not be deterred from accepting the vaccine. Advising parents of the likely  
57  
58 adverse events following a vaccine is an important part of the immunisation process. Vaccine  
59  
60

1 safety is a top priority for parents and if prepared for side effects with advice on their management,  
2 they are likely to be less concerned. This was borne out in one trial of MenB vaccine which  
3 included cohorts of parents who either knew or did not know which vaccines their child was  
4 receiving. Medical attention rates for fever were lower among parents who knew their child was  
5 receiving MenB vaccine, underlining the importance of advising parents about the possibility of  
6 fever following this vaccine.[24]  
7

8  
9  
10  
11  
12  
13  
14  
15  
16 Based on parental reports of their experiences of the immunisation process, we identified elements  
17 where improvements are required. For example, some mothers reported feeling pressurised into  
18 accepting vaccines and first time mothers in particular found the process stressful. Health  
19 professionals may need reminding that the nature of their interactions is a key factor in influencing  
20 a parent's attitudes to immunisation[25] this includes not assuming that attendance for  
21 immunisation indicates parents have no questions or concerns. Making this assumption or lacking  
22 empathy about parents' distress over the pain their child is experiencing may lead to future  
23 defaulting.[26] This is particularly important with the introduction of MenB vaccine, when infants will  
24 be given three injections at their first immunisation visit at eight weeks of age.  
25  
26  
27  
28  
29  
30  
31  
32  
33  
34  
35

36 In contrast, it has also been reported that health professionals may over-estimate parents'  
37 concerns about their child receiving multiple injections.[9] Although some parents in our study  
38 expressed concern about the pain, distress and possible impact on their child's immune system of  
39 having an additional injection, most felt this was outweighed by the value of protection against such  
40 a serious infection. The introduction of MenB will have led to some initial queries or concerns from  
41 both health professionals and parents about the need for an additional injection, but experience  
42 from the introduction of other vaccines suggests that it quickly becomes acceptable practice.[9]  
43 Again, this underlines the importance of a positive recommendation from a confident, well informed  
44 health professional in securing parental acceptance of vaccines.[9]  
45  
46  
47  
48  
49  
50  
51  
52  
53  
54  
55

56 MenB vaccine is another significant milestone in the prevention of bacterial meningitis and  
57 septicaemia. Our findings mirror those from other studies conducted in other high income countries  
58  
59  
60

1  
2 in Europe[27-29] and Australia[30] although there were considerable differences in the populations  
3  
4 sampled in terms of age and sampling methods. Only one other study explicitly explored the  
5  
6 hypothetical impact on vaccine acceptance of an increased risk of mild to moderate fever  
7  
8 associated with the vaccine. That study reported that it reduced intent to immunise for only a small  
9  
10 proportion.[30] The recommendation to give prophylactic paracetamol after the MenB doses at two  
11  
12 and four months represents a change in advice with potential for confusion. Most parents in our  
13  
14 study reported that despite some concerns, if advised to do so they would be likely to administer  
15  
16 paracetamol. However, some may be reluctant and health professionals need to be equipped to  
17  
18 discuss this issue with parents. It will be important to monitor the side effects of MenB vaccine on a  
19  
20 population level and whether increased rates of fever affect uptake of the vaccine or attendance  
21  
22 rates in primary care and Accident and Emergency.  
23

24  
25  
26 The successful implementation of the MenB vaccination programme requires: increased parental  
27  
28 awareness of the infection, the safety and effectiveness of the vaccine, the likelihood of fever and  
29  
30 its management if given concomitantly with other vaccines as well as the safety of giving multiple  
31  
32 vaccines. Although we did not identify any new issues for parents in this study regarding vaccines,  
33  
34 it was still important to explore their views and to consider their information needs. PHE developed  
35  
36 written information for parents, which was informed by our findings.[31-33] Resources to support  
37  
38 the introduction of the vaccine were also developed for health professionals.[34]  
39

40  
41  
42 In view of the successful implementation of other vaccines to prevent meningitis and septicaemia  
43  
44 (Hib, MenC, PCV)[35] and on the basis that parents' perceptions of the severity of a disease is an  
45  
46 important determinant of vaccine uptake,[19] the prospects for the successful introduction of MenB  
47  
48 vaccine seem good. MenB vaccine was introduced into the routine vaccine schedule in the UK in  
49  
50 September 2015 with three doses given at 2, 4 and 12 months concomitantly with other  
51  
52 vaccines.[36] Preliminary vaccine coverage data suggests this has successfully been integrated  
53  
54 into the national programme with uptakes of 94.3% for one dose and 91.5% for two doses at 12  
55  
56 months of age.[37] Our findings may be useful for other high income countries when considering  
57  
58 the implementation of a MenB vaccine programme in highlighting potential issues that need to be  
59  
60

1 addressed. However, in view of differences between population groups in terms of attitudes to and  
2 acceptability of specific vaccines, it would be important to explore whether other issues may apply  
3 that could influence vaccine acceptance.  
4  
5  
6  
7  
8

### 9 **Acknowledgments**

10 Our thanks go to the Children's Centres, mother and toddler groups and the midwife who facilitated  
11 recruitment to the study. We are also grateful to the parents who gave up their time to participate.  
12  
13  
14

### 15 **Footnotes**

#### 16 **Contributors**

17 JY and VS conceived the study. All authors were responsible for the development and refinement  
18 of the study methods. CJ and HB conducted all data collection and data analysis. CJ and HB  
19 drafted the manuscript. All authors contributed to the revisions and approved the final manuscript.  
20 All authors agree to be accountable for all aspects of the work.  
21  
22  
23  
24  
25  
26  
27  
28  
29  
30  
31

#### 32 **Funding**

33 This work was supported by PHE. The study funders were involved in the study conception,  
34 design, interpretation of data, writing of the article and decision to submit the article for publication.  
35 They did not contribute to data collection or data analysis. The research team operated completely  
36 independently of the funders in data collection and data analysis.  
37  
38  
39  
40  
41  
42  
43

#### 44 **Competing Interests**

45 None  
46  
47  
48  
49

#### 50 **Data sharing**

51 There are no unpublished data available.  
52  
53  
54  
55  
56  
57  
58  
59  
60

## References

- [1] Borrow R, Abad R, Trotter C, van der Klis FR, Vazquez JA. Effectiveness of meningococcal serogroup C vaccine programmes. *Vaccine* 2013;31:4477-86.
- [2] Ladhani SN, Flood JS, Ramsay ME, Campbell H, Gray SJ, Kaczmarski EB et al. Invasive meningococcal disease in England and Wales: implications for the introduction of new vaccines. *Vaccine* 2012;30:3710-6.
- [3] NHS England, Public Health England. Introduction of MenB Immunisation for infants. London: NHS England; 2015.
- [https://www.gov.uk/government/uploads/system/uploads/attachment\\_data/file/437906/150622\\_Me nB\\_bipartite\\_letter.pdf](https://www.gov.uk/government/uploads/system/uploads/attachment_data/file/437906/150622_Me nB_bipartite_letter.pdf) (accessed 06/05/16)
- [4] Bedford H, Lansley M. More vaccines for children? Parents' views. *Vaccine* 2007;25:7818-23.
- [5] Peckham C, Bedford H, Senturia Y, Ades A. National immunisation study: Factors influencing immunisation uptake in childhood. Horsham: Action Research for the Crippled Children; 1989.
- [6] de Wals P. Results of a mass immunisation campaign with 4-components serogroup b meningococcal vaccine (4CMenB) in Quebec, Canada .Oral Presentations at Meningitis Research Foundation Conference, London; 2015. <http://www.meningitis.org/conference2015#Wals> (accessed 06/05/16)
- [7] Gossger N, Snape MD, Yu L-M, Finn A, Bona G, Esposito S et al. Immunogenicity and tolerability of recombinant serogroup B meningococcal vaccine administered with or without routine infant vaccinations according to different immunization schedules: a randomized controlled trial. *JAMA* 2012;307:573-82.
- [8] World Health Organisation. Multiple Injections: Protecting Infants as Soon as Possible. Multiple Injections: Acceptability and Safety. Geneva: World Health Organisation; 2014.
- [http://www.who.int/immunization/diseases/poliomyelitis/inactivated\\_polio\\_vaccine/multiple\\_injections\\_acceptability\\_safety.pdf](http://www.who.int/immunization/diseases/poliomyelitis/inactivated_polio_vaccine/multiple_injections_acceptability_safety.pdf) (accessed 06/05/16)
- [9] Wallace AS, Mantel C, Mayers G, Mansoor, O, Gindler, JS, Hyde, TB. Experiences with provider and parental attitudes and practices regarding the administration of multiple injections during infant vaccination visits: lessons for vaccine introduction. *Vaccine* 2014;32:5301-10.



- 1  
2 [10] Smith PJ, Humiston SG, Marcuse EK, Zhao Z, Dorell CG, Howes C et al. Parental delay or  
3 refusal of vaccine doses, childhood vaccination coverage at 24 months of age, and the Health  
4 Belief Model. *Public Health Rep* 2011;126(Suppl 2):135.  
5  
6  
7 [11] Public Health England. Immunisation against Infectious Diseases. Chapter 8: Vaccine safety  
8 and the management of adverse events following immunisation (Page 56). London: Public Health  
9 England; 2014.  
10  
11 [https://www.gov.uk/government/uploads/system/uploads/attachment\\_data/file/147868/Green-](https://www.gov.uk/government/uploads/system/uploads/attachment_data/file/147868/Green-Book-Chapter-8-v4_0.pdf)  
12 [Book-Chapter-8-v4\\_0.pdf](https://www.gov.uk/government/uploads/system/uploads/attachment_data/file/147868/Green-Book-Chapter-8-v4_0.pdf) (accessed 06/05/16)  
13  
14  
15 [12] Purssell E. Parental fever phobia and its evolutionary correlates. *J Clin Nurs* 2009;18:210-8.  
16  
17 [13] Kai J. What worries parents when their preschool children are acutely ill, and why: a qualitative  
18 study. *BMJ* 1996;313:983-6.  
19  
20 [14] Falagas ME, Zarkadoulia E. Factors associated with suboptimal compliance to vaccinations in  
21 children in developed countries: a systematic review. *Curr Med Res Opin* 2008;24:1719-41.  
22  
23 [15] Brown KF, Kroll JS, Hudson MJ, Ramsay M, Green J, Long SJ et al. Factors underlying  
24 parental decisions about combination childhood vaccinations including MMR: a systematic review.  
25 *Vaccine* 2010;28:4235-48.  
26  
27 [16] Tickner S, Leman PJ, Woodcock A. Factors underlying suboptimal childhood immunisation.  
28 *Vaccine* 2006;24:7030-6.  
29  
30 [17] Samad L, Tate AR, Dezateux C, Peckham C, Butler N, Bedford H. Differences in risk factors  
31 for partial and no immunisation in the first year of life: prospective cohort study. *BMJ*  
32 2006;332:1312-3.  
33  
34 [18] Mills E, Jadad AR, Ross C, Wilson K. Systematic review of qualitative studies exploring  
35 parental beliefs and attitudes toward childhood vaccination identifies common barriers to  
36 vaccination. *J Clin Epidemiol* 2005;58:1081-8.  
37  
38 [19] Larson HJ, Jarrett C, Eckersberger E, Smith DM, Paterson P. Understanding vaccine  
39 hesitancy around vaccines and vaccination from a global perspective: A systematic review of  
40 published literature, 2007–2012. *Vaccine* 2014;32:2150-9.  
41  
42 [20] Braun V, Clarke V. Using thematic analysis in psychology. *Qual Res Psycho* 2006;3:77-101.  
43  
44  
45  
46  
47  
48  
49  
50  
51  
52  
53  
54  
55  
56  
57  
58  
59  
60



1 [21] Office for National Statistics. 2011 Census Analysis, Local Area Analysis of Qualifications  
2 Across England and Wales 2014. London: ONS. [http://www.ons.gov.uk/ons/rel/census/2011-  
4 census-analysis/local-area-analysis-of-qualifications-across-england-and-wales/index.html](http://www.ons.gov.uk/ons/rel/census/2011-<br/>3 census-analysis/local-area-analysis-of-qualifications-across-england-and-wales/index.html)  
5  
6

7 (accessed 06/05/16)  
8

9 [22] Benin AL, Wisler-Scher DJ, Colson E, Shapiro ED, Holmboe ES. Qualitative analysis of  
10 mothers' decision-making about vaccines for infants: the importance of trust. *Pediatrics*  
11 2006;117:1532-41.  
12  
13

14 [23] Larson HJ, Cooper LZ, Eskola J, Katz SL, Ratzan S. Addressing the vaccine confidence gap.  
15 *Lancet* 2011;378:526-35.  
16  
17

18 [24] Vesikari T, Esposito S, Prymula R, Ypma E, Kohl I, Toneatto D et al. Immunogenicity and  
19 safety of an investigational multicomponent, recombinant, meningococcal serogroup B vaccine  
20 (4CMenB) administered concomitantly with routine infant and child vaccinations: results of two  
21 randomised trials. *Lancet* 2013;381:825-35.  
22  
23

24 [25] Leask J, Kinnersley P, Jackson C, Cheater F, Bedford H, Rowles G. Communicating with  
25 parents about vaccination: a framework for health professionals. *BMC Pediatr* 2012;12:154.  
26  
27

28 [26] Harrington PM, Woodman C, Shannon WF. Low immunisation uptake: Is the process the  
29 problem? *J Epidemiol Community Health* 2000;54:394-400.  
30  
31

32 [27] Le Ngoc Tho S, Ader F, Ferry T, Floret D, Arnal M et al. Vaccination against serogroup B  
33 *Neisseria meningitidis*: Perceptions and attitudes of parents. *Vaccine* 2015;33:3463-70.  
34  
35

36 [28] Bakhache P, Rodrigo C, Davie S, Ahuja A, Sudovar B, Crudup T et al. Health care providers'  
37 and parents' attitudes toward administration of new infant vaccines—a multinational survey. *Euro J*  
38 *Pediatr* 2013;172:485-92.  
39  
40

41 [29] Mameli C, Faccini M, Mazzali C, Picca M, Colella G, Duca PG et al. Acceptability of  
42 meningococcal serogroup B vaccine among parents and health care workers in Italy: A survey.  
43 *Hum Vaccin Immunother* 2014;10:3004-10.  
44  
45

46 [30] Marshall H, Clarke M, Sullivan T. Parental and community acceptance of the benefits and risks  
47 associated with meningococcal B vaccines. *Vaccine* 2014;32:338-44.  
48  
49

50 [31] Public Health England. A 3 Minute Guide: Protecting your baby against meningitis and  
51 septicaemia. Secondary A 3 Minute Guide: Protecting your baby against meningitis and  
52  
53  
54  
55  
56  
57  
58  
59  
60

1 septicaemia. London: Public Health England; 2015.

2  
3 [https://www.gov.uk/government/uploads/system/uploads/attachment\\_data/file/448028/9183\\_MenB](https://www.gov.uk/government/uploads/system/uploads/attachment_data/file/448028/9183_MenB)  
4 [-DL\\_3\\_Min\\_guide\\_17\\_web.pdf](#). (accessed 06/05/16)

5  
6  
7 [32] Public Health England. Protecting your baby against meningitis and septicaemia caused by  
8 meningococcal B bacteria. London: Public Health England; 2015.

9  
10  
11 [https://www.gov.uk/government/uploads/system/uploads/attachment\\_data/file/448054/9133\\_menB](https://www.gov.uk/government/uploads/system/uploads/attachment_data/file/448054/9133_menB)  
12 [\\_A5\\_Leaflet\\_17\\_web.pdf](#) (accessed 06/05/16)

13  
14  
15 [33] Public Health England. Using Paracetamol to prevent and treat fever after MenB vaccination.  
16 London: Public Health England; 2015.

17  
18  
19 [https://www.gov.uk/government/uploads/system/uploads/attachment\\_data/file/450890/9413-](https://www.gov.uk/government/uploads/system/uploads/attachment_data/file/450890/9413-)  
20 [paracetamol-menB-2page-A4-05-web.pdf](#) (accessed 06/05/16)

21  
22 [34] Public Health England. Meningococcal B (MenB) vaccination programme. London: Public  
23 Health England; 2015. <https://www.gov.uk/government/collections/meningococcal-b-menb->  
24 [vaccination-programme](#). (accessed 06/05/16)

25  
26 [35] Public Health England. Health Protection Report. 10 (44), 16 December 2016.

27  
28  
29  
30  
31  
32  
33  
34  
35  
36  
37  
38  
39  
40  
41  
42  
43  
44  
45  
46  
47  
48  
49  
50  
51  
52  
53  
54  
55  
56  
57  
58  
59  
60  
Quarterly vaccination coverage statistics for children aged up to five years in the UK (COVER  
programme): July to September 2016. London: Public Health England; 2016.

[https://www.gov.uk/government/uploads/system/uploads/attachment\\_data/file/578705/hpr4416\\_cover\\_final\\_v3\\_Web.pdf](https://www.gov.uk/government/uploads/system/uploads/attachment_data/file/578705/hpr4416_cover_final_v3_Web.pdf) (accessed 26/01/17)

[36] Public Health England. Routine childhood immunisations from Summer 2016. London: Public Health England; 2016.

[https://www.gov.uk/government/uploads/system/uploads/attachment\\_data/file/533863/PHE\\_2016\\_Routine\\_Childhood\\_Immunisation\\_Schedule\\_SUMMER2016.pdf](https://www.gov.uk/government/uploads/system/uploads/attachment_data/file/533863/PHE_2016_Routine_Childhood_Immunisation_Schedule_SUMMER2016.pdf) (accessed 26/01/17)

[37] Public Health England. Health Protection Report. 10 (32) 23 September 2016. Preliminary vaccine coverage estimates for the meningococcal B (MenB) immunisation programme for England, update to the end of August 2016. London: Public Health England; 2016.

[https://www.gov.uk/government/uploads/system/uploads/attachment\\_data/file/555057/hpr3216\\_menB.pdf](https://www.gov.uk/government/uploads/system/uploads/attachment_data/file/555057/hpr3216_menB.pdf) (accessed 26/01/2017)

## TOPIC GUIDE FOR INTERVIEWS

### Process

Interviews will use the following format:

1. **Information Sheet and Consent Form:** Confirm that the participant has read and understood the Participant Information Sheet. Provide the opportunity for the participant to ask any further questions about the interview. Participant completes two copies of the consent form.
2. **Interview:** Ask questions below.
3. **Debrief, Participant Background Information Sheet, Gift Voucher and Contact Details form:** Debrief Participant. Complete *Participant Background Information Sheet*. Provide gift voucher. Participant signs *receipt for gift voucher*. Participant completes *Contact Details form* (if have consented).

### Interview

#### 1. Introductions and Attitudes to Vaccination in general

Name of researcher, name of participant(s) – if a group interview then researcher to state who is sitting where (to aid transcription)

First I would like to ask you your views about vaccinations/immunisation for children

What do you think in general about vaccinations for children?

*Prompt*

- Good/bad thing – why?
- Are there any vaccines in particular about which you have different views?

What do you think about the schedule for childhood vaccines? So this is the timings of doses and of the number of vaccines given

*Prompt*

- OK/busy – why?

Are you aware that the schedule changes from time to time, a new vaccine may be added, the number of doses increased or even doses removed?

Why do you think the schedule changes?

*Prompt*

- New vaccines / Vaccines removed / Different timings / More or fewer doses

What do you think about these changes?

*Prompt*

- Good/bad thing – why?

## 2. Meningococcal B Disease and Vaccine

Have you heard of meningococcal disease? What do you know about it?

*Prompt*

- How is it spread?
- What types of infection does it cause? (meningitis, septicaemia)
- What do you know about meningitis/septicaemia?
- Are there any vaccines in the schedule that protect against meningococcal disease? Which ones?

Have you heard about meningococcal B disease? (MenB)

*Prompt*

- How common is it? / Who is most likely to get it?
- What are the symptoms? (how would you recognise meningitis/septicaemia?)
- What are the risks to young children?
- How does it differ from Men C disease?

Have you heard about the MenB vaccine? What do you know?

*Prompt*

- Immunise at 2, 4 and booster at 12 months (catch up 3, 4 months – only 2 doses if 4 months)
- How does it differ (or not) to Men C vaccine?
- Safety

MenB vaccine has been developed and licensed and at the moment the Dept of Health are deciding whether to introduce it for all children. If the vaccine was introduced:

- What information would you want to be included about *MenB* disease in a leaflet for parents?
- What information would you want to be included about the *MenB* vaccine in a leaflet for parents?

If MenB is given with other vaccines there is an increased risk of fever. How do you feel about fever in your young child - How confident are you in managing fever?

*Prompt*

- Do you worry about it?
- When and why?
- Is it the level (i.e. 39 degrees) / Length of time it lasts? / Discomfort / Worry about fits / brain damage / Masking another illness

How do you manage it?

- When would you seek professional advice – when/from where?

1 The advice is that you give your child paracetamol (sachet) after the first 2 doses (2 and 4 months). You  
2 would be advised to administer this at home (3 times), 1. as soon as possible after the jab, 2. 6-8 hours  
3 later 3. and again 6-8 hours later. This reduces the likelihood of fever without affecting how well the  
4 vaccine works.  
5  
6

7  
8  
9 What do you think about the need to give your child paracetamol after the MenB vaccination?

10  
11 *Prompt*

- 12 • Is it a concern to you – why/why not?
- 13 • Would you do it? (what if no sign of fever?)

14  
15  
16  
17 The GP practice will provide 1 paracetamol dose in a sachet. You need to provide the other 2 doses  
18 yourself.

19  
20  
21 *Prompt*

- 22 • What do you think about that?
- 23 • Do you have paracetamol for children at home?
- 24 • Is it a concern to you – why/why not?

25  
26  
27  
28 What information would you want to be included about *fever after MenB vaccine and paracetamol* in a  
29 leaflet for parents?  
30  
31

32  
33  
34 Would you have the MenB vaccine if it was offered?

35  
36 *Prompt*

- 37 • Would you consider not having the other vaccines at that time point so that your child can have  
38 MenB without the increased risk of fever? Why / why not?

### 3. Delivery of MenB vaccine

39  
40  
41  
42  
43  
44  
45 When the MenB vaccine is introduced, this will mean that children will have more injections in one visit (3  
46 instead of 2 at both 2 months and 4 months – N.B. until recently they had 3 injections at 4-month visit but  
47 that dose of Men C is removed from schedule now). What do you think about that?

- 48 • Is it a concern to you – why/why not?

49  
50  
51  
52  
53 Given that the risk of fever is increased when MenB is given with other vaccines, how would you prefer  
54 to have it? Why? (i.e. about  $\frac{1}{4}$  get fever with MenB alone, about  $\frac{1}{4}$  with other vaccines alone, but  $\frac{1}{2}$  get  
55 fever with MenB AND other vaccines) – the level of fever is no higher than with other vaccines, just more  
56 likely to get it.  
57

- 58 • At the same time (when fever is likely)
- 59 • At a separate visit?

1 At the 12 month visit, it will mean 4 vaccines are given – what would you prefer? Why?

- 2
- 3 • 2 visits with 2 injections at each visit / 3 and 1 / all 4 in one visit
- 4

5 What information would you want to be included about the *number of injections per visit* in a leaflet?

6

7

8

#### 9 **4. Drafts of Materials**

10 Finally, thinking about what we have discussed so far about MenB, I would like you to now look at the 3

11 leaflets and let me know what you think.

12

13

14

15 Go through leaflets in turn, page by page (vary order look at them)

- 17 • 2 minutes guide to MenB
- 18 • MenB full leaflet
- 19 • Paracetamol
- 20
- 21
- 22
- 23
- 24 • What is the most important thing for you to know from this leaflet? (what is next most important etc.?)
- 25 • What is less important?
- 26
- 27 • Should information for the MenB and C vaccines be combined – why/why not?
- 28 • How do you like the information to be presented – bullet points/pictures/how much detail
- 29
- 30 • Precise wording
- 31
- 32 • Q&A format
- 33
- 34
- 35

#### 36 **5. Off label vaccines**

37 What do you think about 'off label' vaccines (it is licenced for different patients/conditions?)

38 *Prompt*

- 39 • Would you let your child have an 'off label' vaccine? Why/why not?
- 40
- 41 • Any particular circumstances?
- 42
- 43
- 44

#### 45 **6. Final Comments**

46 Is there anything else about MenB or childhood vaccines more generally that you want to tell me before

47 we finish?

48

49

50

51

52

53

54

55

56

57

58

59

60
